1 **Peripheral neuropathy linked mRNA export factor GANP**

2 **reshapes gene regulation in human motor neurons**

3

4 Rosa Woldegebriel<sup>1,2</sup>, Jouni Kvist<sup>1</sup>, Matthew White<sup>2</sup>, Matilda Sinkko<sup>1</sup>, Satu Hänninen<sup>3,4</sup>,  
5 Markus T Sainio<sup>1</sup>, Rubén Torregrosa-Munumer<sup>1</sup>, Sandra Harjuhaahto<sup>1</sup>, Nadine Huber<sup>5</sup>, Sanna-  
6 Kaisa Herukka<sup>6,7</sup>, Annakaisa Haapasalo<sup>5</sup>, Olli Carpen<sup>3,4</sup>, Andrew Bassett<sup>8</sup>, Emil Ylikallio<sup>1,9</sup>,  
7 Jemeen Sreedharan<sup>2\*</sup>, Henna Tyynismaa<sup>1,10,11\*</sup>

8

9 1 Stem Cells and Metabolism Research Program, Faculty of Medicine, University of Helsinki,  
10 00290 Helsinki, Finland.

11 2 Maurice Wohl Clinical Neuroscience Institute, Institute of Psychiatry, Psychology and  
12 Neuroscience, King's College London, London, UK.

13 3 Department of Pathology, University of Helsinki and Helsinki University Hospital, Helsinki,  
14 Finland.

15 4 Research Program in Systems Oncology, University of Helsinki, Helsinki, Finland.

16 5 A.I. Virtanen Institute for Molecular Sciences, University of Eastern Finland, Kuopio,  
17 Finland.

18 6 Department of Neurology, Kuopio University Hospital, Kuopio, Finland.

19 7 Neurology, Institute of Clinical Medicine, University of Eastern Finland, Kuopio, Finland.

20 8 Wellcome Sanger Institute, Wellcome Genome Campus, Hinxton, Cambridge, UK.

21 9 Clinical Neurosciences, Neurology, University of Helsinki and Helsinki University Hospital,  
22 00290 Helsinki, Finland.

23 10 Department of Medical and Clinical Genetics, University of Helsinki, 00290 Helsinki,  
24 Finland.

25 11 Neuroscience Center, Helsinki Institute of Life Science, University of Helsinki, Helsinki,  
26 Finland.

27

28 \*These authors contributed equally

29 Corresponding author: Henna Tyynismaa, Biomedicum Helsinki, r.C525b, Haartmaninkatu 8,  
30 00290 Helsinki, Finland. Tel: +358 2941 25654; Email: [henna.tyynismaa@helsinki.fi](mailto:henna.tyynismaa@helsinki.fi)

31

32

33

34

35

36

37

38

39

40

41

42

43

44

45

46

47

48

49

50

51

52

53 **SUMMARY**

54 Loss-of-function of the mRNA export protein GANP (*MCM3AP* gene) cause early-onset  
55 sensorimotor neuropathy, characterised by axonal degeneration in long peripheral nerves.  
56 GANP functions as a scaffold at nuclear pore complexes, contributing to selective nuclear  
57 export of mRNAs. Here, we aimed to identify motor neuron specific transcripts that are  
58 regulated by GANP and may be limiting for local protein synthesis in motor neuron axons. We  
59 compared motor neurons with a gene edited mutation in the Sac3 mRNA binding domain of  
60 GANP to isogenic controls. We also examined patient-derived motor neurons. RNA  
61 sequencing of motor neurons as well as nuclear and axonal subcompartments showed that  
62 mutant GANP had a profound effect on motor neuron transcriptomes, with alterations in nearly  
63 40 percent of all expressed genes and broad changes in splicing. Expression changes in multiple  
64 genes critical for neuronal functions, combined with compensatory upregulation of protein  
65 synthesis and early-stage metabolic stress genes, indicated that RNA metabolism was abnormal  
66 in GANP-deficient motor neurons. Surprisingly, limited evidence was found for large-scale  
67 nuclear retention of mRNA. This first study of neuropathy-linked GANP defects in human  
68 motor neurons shows that GANP has a wide gene regulatory role in a disease-relevant cell type  
69 that requires long-distance mRNA transport.

70

71

72

73 **Keywords:** peripheral neuropathy, Charcot-Marie Tooth disease, intellectual disability,  
74 GANP, *MCM3AP*, mRNA export, isogenic, pluripotent stem cells, motor neurons, CRISPR-  
75 Cas9, RNA metabolism

76

77

78

79

80

81

## 82 INTRODUCTION

83 Gene expression - from mRNA synthesis to splicing, maturation and export from the nucleus  
84 to the cytoplasm for translation - is an interconnected process mediated through large  
85 macromolecular complexes [13,31,51]. For example, the nuclear pore complex (NPC), which  
86 is a large protein assembly embedded in the nuclear membrane, is not merely a gateway  
87 enabling nucleocytoplasmic transport but also affects upstream gene expression regulation  
88 [17,54]. Associating with the nuclear basket of the NPC, germinal centre associated nuclear  
89 protein (GANP) is involved in mRNA export acting as a large scaffold in the TRanscription  
90 and EXport-2 complex (TREX-2) [20,59]. GANP, a 210 kDa protein, has N-terminal FG  
91 (phenylalanine/glycine) repeats, a yeast Sac3 mRNA binding homology domain, and a C-  
92 terminal acetyltransferase domain. GANP has been described as a mediator of selective mRNA  
93 export, thus facilitating dynamic regulation of specific biological processes [57,58].

94 We and others recently identified GANP to underlie a childhood-onset neurological syndrome,  
95 caused by biallelic mutations in its encoding gene *MCM3AP* (MIM #618124, PNRIID)  
96 [23,24,49,61,63]. The disease affects peripheral nerves causing Charcot-Marie-Tooth  
97 neuropathy, and results in gait difficulties, often with loss of ambulation. Many patients have  
98 intellectual disability. Variable other central nervous system involvement such as  
99 encephalopathy or epilepsy have been reported in some patients, as well as non-neurological  
100 symptoms such as ovarian dysfunction [61,63]. Studies in patient fibroblasts showed that  
101 pathological *MCM3AP* variants either result in a decrease in the amount of GANP at the nuclear  
102 envelope or affect critical amino acids in the Sac3 mRNA binding domain of GANP [61].  
103 Depletion of GANP was associated with more severe motor phenotypes than the Sac3 variants.

104 Our identification of GANP loss-of-function as a cause for human neurological disease  
105 suggested a key role for GANP in neuronal cells, and particularly in motor neurons.  
106 Interestingly, GANP was previously found to modify TDP-43 toxicity in fly motor neurons  
107 [50]. However, the functions of GANP, and its roles in gene regulation and mRNA export  
108 selectivity in human neurons remain unresolved. We hypothesised that inefficient mRNA  
109 export limiting the availability of mRNAs for local protein synthesis in axon terminals could  
110 be a pathogenic mechanism in GANP-associated disease. Here we set out to investigate the  
111 effects of GANP variants in human induced pluripotent stem cell (hiPSC) derived motor  
112 neurons. Our results show that GANP mutant motor neurons differentiate normally in culture  
113 but have altered expression of nearly 40 percent of their genes, and major changes in gene

114 splicing. Thus, we suggest that GANP has a key gene regulatory role in human motor neurons  
115 beyond scaffolding for mRNA export.

116

## 117 **RESULTS**

### 118 ***MCM3AP* gene edited and patient-derived hiPSC are pluripotent**

119 We used CRISPR-Cas9 gene editing to knock in different *MCM3AP* patient mutations in the  
120 kolf2\_c1 parental hiPSC line [26] by homology-directed repair [3]. 128 clones were screened  
121 for mutations by MiSeq, and successful editing was detected for the patient mutation R878H  
122 located in the Sac3 domain of GANP [23] (Figure 1A,B). Sanger sequencing of the edited  
123 hiPSC clones showed that one clone was homozygous for the mutation. Karyotypes of the  
124 homozygous edited and parental lines were as expected 46 XY by g-banding.

125 We also reprogrammed skin fibroblasts of patients FIN1 and FIN2, who carry V1272M and  
126 P148\*fs48 compound heterozygous variants, which result in depletion of GANP [61,63], and  
127 of two healthy unrelated controls (Figure 1A,B).

128 Pluripotency of all the above mentioned hiPSC was confirmed with Nanog  
129 immunocytochemistry (Figure 1C) and by qRT-PCR of pluripotency genes (Figure 1D). Tested  
130 pluripotency genes had higher expression in edited cells compared to parental hiPSC (*NANOG*,  
131 *OCT4*, and *C-MYC*  $p<0.0001$ ; *SOX2*  $p<0.05$ ). For pluripotency gene expression, we also  
132 investigated two additional edited hiPSC clones with heterozygous R878H mutation in one  
133 allele and an indel in the other allele (clones 138 and 245, Supplementary Figure 1), and found  
134 increased pluripotency gene expression also in those (*NANOG*,  $p<0.0001$ ). In patient-derived  
135 hiPSC, pluripotency genes were similarly expressed as in control hiPSC, apart from *C-MYC*,  
136 which was higher in the patient-derived cells ( $p=0.0060$ ) (Figure 1D).

### 137 **Mutation type affects GANP levels in hiPSC**

138 We have previously shown in patient fibroblasts that homozygous missense variants affecting  
139 the Sac3 domain of GANP do not alter *MCM3AP* mRNA or GANP protein levels, whereas  
140 compound heterozygous variants outside the Sac3 domain typically lead to lowered *MCM3AP*  
141 mRNA level and depletion of GANP at the nuclear membrane [61]. Here, we used  
142 immunostaining to detect GANP in the hiPSC lines. We found that GANP localized to nuclear  
143 pores in the R878H/R878H knock-in, parental and healthy control hiPSC lines, but was reduced

144 in hiPSC of patient FIN1 (Figure 1E), in line with our previous findings in fibroblasts.  
145 *MCM3AP* mRNA levels were reduced by approximately 30% in patient hiPSC compared to  
146 healthy controls, whereas we observed a 25% increase in the R878H/R878H knock-in line  
147 compared to the parental line (Figure 1F). These results are consistent with the two types of  
148 disease-causing *MCM3AP* variants having different effects on the level of GANP at the nuclear  
149 envelope.

### 150 **Patient-derived and knock-in hiPSC differentiate into motor neurons**

151 To determine the effects of GANP variants in a disease-relevant cell type, we next  
152 differentiated hiPSC lines into motor neurons [15] (Figure 2A). Differentiation into a neuronal  
153 lineage was validated by qRT-PCR analysis of the cytoskeletal markers neurofilament heavy  
154 (*NEFH*) and  $\beta$ III-Tubulin (*TUBB3*), and into a motor neuron lineage by analysis of choline  
155 acetyltransferase (*CHAT*) and ISL LIM homeobox 1 (*ISL1*) (Figure 2B). Immunofluorescence  
156 analysis showed that differentiated cells from all hiPSC lines were positive for neurofilament  
157 medium (NEFM), ISL1, and homeobox gene Hb9 (Figures 1C,D). ISL1 positivity was above  
158 92% by the end of differentiation. In essence, we found that all hiPSCs differentiated similarly  
159 into motor neurons.

### 160 **GANP is detected in patient-derived motor neurons**

161 We immunostained the motor neurons and found that GANP localized to the nuclear pores in  
162 R878H/R878H knock-in, parental and healthy control motor neurons (Figure 3A). In contrast  
163 with our previous observations in FIN patients' fibroblasts, in which GANP staining was  
164 depleted at the nuclear envelope, we detected GANP staining in patient-derived motor neurons.  
165 Nonetheless, also some abnormally staining nuclei were found particularly in FIN2 patient  
166 samples (Figure 3A). Patient-derived motor neurons had approximately 30% reduced  
167 *MCM3AP* mRNA levels in comparison to healthy controls ( $p=0.0007$ ), whereas the levels were  
168 unchanged in R878H/R878H knock-in motor neurons (Figure 3B). Staining with NPC marker  
169 Mab414 appeared normal, suggesting that the nuclear envelope was intact in mutant and  
170 control motor neurons (Figure 3C).

### 171 **GANP regulates gene expression in motor neurons**

172 Given the roles of GANP in RNA processing, we next assessed whether mutant GANP affected  
173 gene expression in differentiated motor neurons by sequencing total RNA isolated from  
174 R878H/R878H knock-in neurons and isogenic control cells (Figure 4A). The motor neuron

175 differentiation protocol we utilized yielded mostly homogeneous neuronal cultures, although  
176 as differentiation progressed, mitotic progenitors were also occasionally seen. For RNA  
177 sequencing we thus collected the neurons on day 22 of differentiation, and only from wells  
178 which did not have progenitor cells.

179 Since GANP has roles in the nuclear export of RNA we also performed RNA sequencing on  
180 separate nuclear and axonal RNA fractions (Figure 4A). For the nuclear subcompartment,  
181 validation of the purity of the isolated nuclear fraction by western blotting showed highly  
182 enriched histone H3 protein (Figure 4B). To analyse transcripts specific to axons, we cultured  
183 motor neurons in Xona Chip devices consisting of microfluidic axon isolation technology. We  
184 then dissociated motor neurons from porous 1  $\mu\text{m}$  filter inserts to obtain an isolated axon  
185 compartment [4]. The coating of the filter bottom with laminin encourages the attachment of  
186 axons, whilst the somatodendritic compartment grows on top of the filter. We validated the  
187 purity of our isolation of axons by western blotting, which showed low histone H3 levels  
188 (Figure 4B). To collect sufficient RNA for axon-Seq, samples from 6 separate wells for each  
189 replicate were combined, and in addition ribosomal RNA was depleted.

190 Principal component analysis of the RNA sequencing data showed that the sample types (total,  
191 nuclear, and axonal) clustered away from each other, indicating successful subcompartment  
192 isolation. Axon samples separated more from total and nuclear samples, demonstrating the  
193 uniqueness of the axonal transcriptome [38]. The overall motor neuron axon transcriptome was  
194 similar to previously reported datasets demonstrating enrichment in mtDNA- and nuclear-  
195 encoded mitochondrial respiratory chain genes, neurofilaments and expression of *TMSB10*,  
196 *YBX1* and *STMN2* [27,36,38]. Samples of the same genotype clustered together based on their  
197 gene expression, particularly for total and nuclear RNA, whereas axon samples showed more  
198 variation (Figure 4C).

199 Total RNA sequencing of R878H/R878H knock-in motor neurons showed that GANP has a  
200 major role in gene expression regulation in human motor neurons. Out of the 18,146 genes that  
201 we detected to be expressed in motor neurons, 7,044 (~39%) were differentially expressed (DE)  
202 between R878H/R878H and parental motor neurons (adjusted p-value <0.01) (Figure 4D). The  
203 results for nuclear RNA were similar, showing 5,612 DE genes. More than 50% of the DE  
204 genes were the same in total and nuclear RNA (Figure 4E). Axon-Seq, by contrast, showed  
205 only 297 altered genes.

206 Overall pathway analysis of DE genes by Reactome enrichment indicated downregulation of  
207 genes related to neuronal system and extracellular matrix organization (Figure 4F). Several  
208 crucial axon guidance and maintenance genes were downregulated in GANP-deficient motor  
209 neurons including *SLITRK1*, *SLITRK3*, *DRAXIN*, *LSAMP* and axon repulsive genes involved  
210 in glutamatergic synapses (*NETO1*, *NETO2*, *SHISA9*, *GRIN1*, *NPTX1*) and neuronal system  
211 genes (*GABRG2*, *SYN2*, *SYT9*) (Figure 5).

212 The overall upregulated genes in GANP-deficient motor neurons were associated with  
213 pathways involved in mitochondrial respiration, and in protein synthesis such as ribosomal  
214 subunits and translation elongation. This could indicate compensatory effects in response to  
215 altered mRNA export from the nucleus (Figure 4F, Figure 5). Interestingly, mtDNA-encoded  
216 transcripts were downregulated, whereas nuclear-encoded mitochondrial transcripts were  
217 upregulated, suggesting a nuclear response to mitochondrial dysfunction. Related to energy  
218 metabolic changes, CKB (brain-type creatine kinase) involved in compartmentalized ATP  
219 production and consumption was also upregulated [47]. Furthermore, upregulation of the serine  
220 and one-carbon biosynthesis pathway (*PHGDH*, *PSAT1*, *SHMT2*, *MTHFD2*) was detected,  
221 which is commonly observed in mitochondrial defects and as part of the integrated stress  
222 response [11,16].

223 The axonal transcriptome of GANP mutant motor neurons showed decreased levels of  
224 transcripts related to synaptic function such as glutamate ionotropic receptor subunits (Figure  
225 5). Increased levels of a number of histone genes (for example *HIST2H2AC*, *HIST1H2BN*,  
226 *HIST1H1B*) were observed in mutant axons (Figure 5). As histone mRNAs are not expected to  
227 be translated in axons, this finding may have resulted from enrichment of histone mRNAs  
228 lacking polyA tails. However, we previously found in patient fibroblasts that GANP may  
229 specifically influence the export of intronless gene mRNAs [61], and it is possible that histone  
230 genes, which are intronless, escape the regulation by mutant GANP in neurons. Indeed, we  
231 identified a subset of intronless genes that were differentially expressed in motor neurons and  
232 in the nuclear subcompartment (*ADRA2A*, *PIGM*, *NORAD*, *ATXN7L3B*).

233 Although genes related to neuronal functions were generally downregulated in knock-in motor  
234 neurons, neurofilament genes *NEFL* and *NEFM* were increased ( $p < 0.0001$ ) (Figure 5).  
235 Interestingly, by using qRT-PCR we found that *NEFM* expression was also increased in  
236 patient-derived motor neurons compared to controls (Figure 6A). The upregulation of  
237 neurofilament genes may be linked to our previous observation that *NEFL* expression is



238 regulated by changes in protein synthesis [45]. Another possibility is that neurofilament gene  
239 expression was increased as a response to axonal injury. Indeed, neurofilaments are released  
240 by neurons in neurodegenerative diseases [25]. We therefore measured NEFL protein in the  
241 culture media but found that GANP knock-in or patient-derived motor neurons did not release  
242 more NEFL than control cells (Figure 6B). We also used microfluidic chips to test if the altered  
243 neurofilament gene expression affected the regeneration capacity following axotomy, but we  
244 did not detect defective axon regrowth in GANP knock-in motor neurons (Figure 6C).

245 We hypothesized that a defect in selective mRNA export should lead to nuclear mRNA  
246 retention and thus axonal depletion of a set of mRNAs. Thus, we analysed the RNASeq data  
247 for transcripts that were upregulated in GANP knock-in nuclei and downregulated in axons.  
248 However, only few such genes were detected (Figure 6D). One of those was *PRIMAI*, involved  
249 in organizing and anchoring acetylcholinesterase at neural cell membranes [41]. We studied  
250 the localization of *PRIMAI* mRNA by RNAScope but did not observe any obvious nuclear  
251 retention in the GANP mutant neurons (Figure 6E). Thus, we conclude that the R878H Sac3  
252 mutation in GANP does not cause large-scale nuclear retention of mRNAs in human motor  
253 neurons but has a major effect on motor neuronal gene regulation.

#### 254 **GANP regulates gene splicing in motor neurons**

255 Finally, we analysed the effects of the R878H mutation on mRNA splicing in human motor  
256 neurons by KissSplice analysis. We observed a large number of significant alterations in  
257 splicing in motor neurons, in 421 genes, and fivefold more (in 2224 genes) in nuclear RNA  
258 sequencing (Figure 7A). The majority of these involved the usage of alternative splice sites, or  
259 were exon skipping or intron retention events. Splicing changes were observed both in genes  
260 that had an overall decreased mRNA expression, and in genes that were not differentially  
261 expressed (Figure 7B,C). As an example, a higher percentage of exon skipping was detected  
262 for *GABRG2*, inhibitory gamma-aminobutyric acid receptor subunit, which is alternatively  
263 regulated in neuronal development [56] (Figure 7D).

264

#### 265 **DISCUSSION**

266 GANP was initially identified as an abundant protein in splenic germinal centers, which are  
267 responsible for development of B cells [30], and subsequently the role of GANP has been  
268 extensively characterized in the context of B cell affinity maturation [46]. The recognition of

269 GANP as a mammalian mRNA export factor [59] was preceded by the identification of the  
270 yeast homologue of GANP, Sac3 [9,12,42], and the Drosophila homologue Xmas-2 [29].  
271 Depletion of both Sac3 and Xmas-2 results in nuclear poly(A)<sup>+</sup> RNA accumulation. Later  
272 studies showed that GANP stably associates with the nuclear pore basket [54], forming a  
273 scaffold for ENY2, PCID2 and centrin binding at TREX-2, thus firmly linking GANP to  
274 mRNA export [20]. Interestingly, GANP was then shown in HCT116 colon carcinoma cells to  
275 promote the export of highly expressed and short-lived transcripts that function particularly in  
276 RNA synthesis and processing, indicating that GANP can enable rapid changes in gene  
277 expression [58].

278 The identification of *MCM3AP* as a disease-linked gene causing a peripheral neuropathy  
279 syndrome prompted us to study GANP's role in a disease relevant cell type. Although the  
280 phenotypes associated with GANP mutations are not restricted to peripheral nerves, motor  
281 neurons, which have a requirement for mRNAs to be transported extremely long distances into  
282 axon terminals, are particularly affected. Pathogenic variants in the mRNA export factor GLE1  
283 also underlie a motor neuron disease, suggesting that motor neurons are vulnerable to  
284 inefficient mRNA export [10,21,39]. Reduced mRNA availability could have a major effect on  
285 local protein synthesis in axons, which is now recognized to be important for axon maintenance  
286 and synaptic function [34].

287 We aimed to identify human motor neuron specific genes that are regulated by GANP by  
288 utilizing a neuropathy-causing Sac3 domain mutant, which we generated by CRISPR/Cas9  
289 gene editing in hiPSC. The homozygous missense variant R878H does not change the  
290 localization or the amount of GANP at the nuclear envelope but introduces local structural  
291 changes in the winged helix region of Sac3, thus impairing RNA binding [61]. We previously  
292 showed that GANP variants can be divided into two groups – compound heterozygous variants  
293 leading to GANP depletion, and homozygous Sac3 domain missense variants. Both cause loss-  
294 of-function, but notably the Sac3 variants associate with milder motor phenotypes than the  
295 GANP depletion variants [61-63]. This suggests that R878H and other Sac3 mutants cause  
296 partial impairment of GANP function. Unexpectedly, in the patient-derived motor neurons  
297 GANP was not strongly depleted, in contrast to what we observed in fibroblasts and iPSC from  
298 the same individuals [61]. The reason for this discrepancy is not known, but since the  
299 compound heterozygous mutations carried by these individuals include a frameshift variant in  
300 the first exon of *MCM3AP*, we speculate that the downregulation of nonsense-mediated decay

301 response, which has been shown to be required for neuronal differentiation [19], may have  
302 resulted in higher amount of residual GANP.

303 Our results showed that motor neurons deficient for the RNA binding function of GANP  
304 differentiated normally but had major changes in gene regulation, including abnormal gene  
305 expression and splicing. Mutant GANP deregulated a large number of genes required for motor  
306 neuron functionality, whereas transcripts required for protein synthesis were upregulated,  
307 which we suggest is a compensatory response to abnormal mRNA availability. Expression of  
308 nuclear-encoded mitochondrial genes was also upregulated, which may compensate for the  
309 reduced availability of those transcripts in axonal protein synthesis that is needed to maintain  
310 functional mitochondria. Mitochondrial transcripts are among the most abundant mRNAs in  
311 axons [2,5,14,40,52,60], indicating their importance in local maintenance of axonal and  
312 synaptic mitochondria. We also observed a transcriptional upregulation of the serine and one  
313 carbon biosynthesis, an early-stage of integrated stress response, which may be caused by  
314 mitochondrial dysfunction [7,11,16]. These neuronal compensatory responses may be of  
315 relevance in patients who have the permanent impairment of GANP but have not been observed  
316 in studies of transient GANP depletion [1,58].

317 Previous studies of GANP depletion in diverse non-neuronal cell types have resulted in  
318 expression changes in genes that were largely distinct from those we detected here in GANP  
319 mutant motor neurons. However, one of the rare common findings in all studies is the  
320 downregulation of the intronless gene *ATXN7L3B*, encoding an adaptor protein in the TREX-  
321 2 complex. It was downregulated by GANP siRNA knockdown in human colon carcinoma  
322 cells [58], in our study of patient fibroblast gene expression [61], in a recent study of a degron  
323 system induced GANP knockdown in a colorectal cancer line [1], and in the GANP mutant  
324 motor neurons. Together, these findings suggest that *ATXN7L3B* is a specific target of GANP  
325 regulation regardless of cell type. Interestingly, *ATXN7L3B* is also a subunit of the Spt-Ada-  
326 Gcn5 acetyltransferase (SAGA) complex, involved in histone modifications and thus in gene  
327 expression regulation [28]. The multiple effects that GANP has on gene regulation may thus  
328 be mediated by the SAGA complex, or through the interactions of GANP with the other large  
329 complexes that are interconnected from transcription to splicing and mRNA export.

330 In conclusion, we have shown that GANP is a major gene regulator in human motor neurons,  
331 with effects beyond its role in mRNA export. Large-scale nuclear mRNA retention was not  
332 observed in our neuronal model with the GANP Sac3 missense mutation, which suggests that

333 the disease-associated impairment is moderate enough to enable the export of most mRNAs,  
334 but nevertheless limits mRNA availability, resulting in compensatory responses in protein  
335 synthesis and metabolism. Our findings are consistent with GANP-associated disease effects  
336 on projection neurons with long axons in human patients.

337

## 338 **MATERIALS AND METHODS**

### 339 **hiPSC culture and maintenance**

340 hiPSC were expanded and grown for experiments in E8/E8 Flex basal media with 50X  
341 supplement (Thermo) and Primocin (1:500). Cells were routinely passaged with Versene  
342 (Thermo) or EDTA and grown on Vitronectin (Thermo). When required, Revitacell/Y-27632  
343 was added (1:1000). All cells used in this study were culture at 37°C, in a humidified  
344 atmosphere, normoxia and 5% CO<sub>2</sub>.

### 345 **Reprogramming**

346 Human skin fibroblasts from two healthy controls and from two patients (P148fs\*/V1272M)  
347 [63] were reprogrammed into pluripotent stem cells at Biomedicum Stem Cell Center  
348 (University of Helsinki, Finland). Patient cells were reprogrammed in oriP/EBNA1 backbone  
349 and expression of OCT3/4, SOX2, KLF4, MYC, LIN28 and shRNA against p53. All cell lines  
350 were validated for cell growth, hiPSC morphology and pluripotency gene expression by  
351 immunocytochemistry, RT-PCR and qPCR. hiPSC were cultured in Matrigel-coated (Corning)  
352 plates with E8-medium (Gibco) supplemented with E8-supplement (Gibco). Cells were  
353 passaged when confluent with 0.5 mM EDTA (Invitrogen) in phosphate-buffer saline (PBS).

### 354 **Gene editing**

355 Gene editing was done following a previously published protocol [3]. Kolf2\_C1 p.13 human  
356 induced pluripotent stem cells (hiPSCs) characterised by the HipSci consortium [32] were  
357 cultured in a humidified incubator at 37°C and 5% CO<sub>2</sub>. The cells were cultured in feeder-free  
358 conditions in 10 cm culture dishes in TeSR-E8 (Stem Cell Tech) medium on SyntheMAX  
359 (2µg/cm<sup>2</sup>) (Corning #3535). For passaging cells were washed with PBS (no Mg/Ca<sup>2</sup>), incubated  
360 with Gentle Cell Dissociation Reagent (Stem Cell Tech) at 37°C for 3 min and added TesR-E8  
361 media.

362 The synthetic guide RNA (sgRNA) harbouring the R878H mutation (clones R878H/R878H  
363 and R878H/indel-138), AGCATCCTTGCGGATCTGAG, was ordered from Synthego  
364 following design of effective guides (<https://wge.stemcell.sanger.ac.uk>). A single stranded  
365 oligonucleotide(ssODN), sequence: 5-  
366 GCTGTGTGCTCACCGTGTACGCAAAGTTGAGCGCCCGGAGAGCATCCTTGTGGAT  
367 CTGAGAGGAGGAGCGAAATCACTGCAGTCTCAGACGAAGGCCAGT-3, was  
368 ordered from IDT. sgRNA GATCCGCAAGGATGCTCTCC GGG (reversed) and ssODN 5-  
369 ACTGGGCCTTCGTCTGAGACTGCAGTGATTCGCTCCTCCTCTCAGATCCACAAG  
370 GATGCTCTCCGGGCGCTCAACTTTGCGTACACGGTGAGCACACAGC-3 was used to  
371 produce clone: R878H/indel-245. Desalted ssODN (IDT, Ultramer DNA oligo) had equal  
372 homology arms of 50 bases around the mutation.

373 Confluent 10 cm petri dish was dissociated with Accutase into single cells. 1 million cells were  
374 used for electroporation. *SpCas9* ribonucleoprotein complexes (RNP) were formed with  
375 sgRNA and ssODN. sgRNA oligos were suspended in IDT duplex buffer solution at  
376 concentration 200µM and 500 pmol ssODN templates at final concentration of 100µM. Cas9  
377 (purified from *E.coli*) suspended in Cas9 storage buffer and RNP was reconstituted to a final  
378 concentration of 4µg/µl. Cells were electroporated with Amaxa 4D using (Lonza #AAF-  
379 1002B, #AAF-1002x) suspended in P3 Primary cell 4D-Nucleofector X Kit L (Lonza, V4XP-  
380 3012) and CA137 program. Final concentration of Cas9 per 1 M cells was 20 µg and 20 µg  
381 sgRNA. Cells were processed and plated in TeSR-E8 media with Rock inhibitor (Y-27632) on  
382 SyntheMAX coated (5µg/cm<sup>2</sup>) 6-well plates. Cells were fed daily until 70% confluent.  
383 Recovered cells were dissociated three days later from semi-confluent wells with Gentle Cell  
384 Dissociation Reagent and frozen in 90% knock-out serum replacement with 10% DMSO.

### 385 **Karyotyping**

386 To process cells for karyotyping, hiPSC were grown on 6 cm dishes until semi-confluent.  
387 Colcemid 10 µg/mL was added to the cells and placed in the incubator for 4 hrs. After two  
388 washes with PBS, the cells were dissociated with Tryple Select (Gibco). DMEM was added  
389 and cells were centrifuged 200 g for 5 min. The cells were incubated in KCl at +37°C. Cells  
390 were fixed with 25% Acetic acid in methanol and centrifuged in 200 g 5 min, and this was  
391 repeated in total three times. Karyotype analyses based on chromosomal G-banding were  
392 performed at Analisis Mediques Barcelona.

### 393 **Motor neuron differentiation**

394 To differentiate hiPSC into motor neurons, we used a previous described protocol [55] with  
395 small modifications. In summary, confluent hiPSC were dissociated into low-attachment flasks  
396 with 0.5 mM EDTA and cultured in Neuronal basal medium (DMEM/F12/Glutamax,  
397 Neurobasal vol:vol, with N2 (Life Technologies), B27 (Life technologies), L-ascorbic acid 0.1  
398 mM (Santa Cruz) and Primocin supplemented with 5  $\mu$ M Y-27632 (Selleckchem)/40  $\mu$ M  
399 SB43154 (Merck)/ 0.2  $\mu$ M LDN-193189 (Merck/Sigma)/3  $\mu$ M CHIR99021 (Selleckchem) for  
400 2 days. Following five days the cells were cultured in basal media and 0.1  $\mu$ M retinoic acid  
401 (Fisher)/0.5  $\mu$ M SAG (Calbiochem) and for the next 7 days, BDNF and GDNF (10 ng/ml,  
402 Peprotech) were added. 20  $\mu$ M DAPT (Calbiochem) was added for days 9-17. Day 10 neurons  
403 grown in spheroids were dissociated with Accumax (Invitrogen) on poly-D-lysine 50  $\mu$ g/ml  
404 (Merck Millipore) and laminin 10  $\mu$ g/ml (SigmaAldrich). Day 17 onwards until analysis,  
405 neurons were kept in BDNF, GDNF and CNTF. Media were changed every 2-3 days by  
406 replacing half of the medium. Developing motor neurons were analysed for experiments from  
407 day 22 onwards.

#### 408 **cDNA synthesis and RT-PCR**

409 iPSC and neuron total RNA was isolated with Nucleospin RNA kit (#740955.50, Macherey-  
410 Nagel). cDNA was synthesized according to manufacturer's instructions with Maxima First  
411 Strand cDNA Synthesis Kit (#K1671, Thermo Fisher Scientific).

#### 412 **qRT-PCR**

413 qPCR was run on a CFX96 Touch Real-Time PCR detection system (Bio-Rad) with SYBR  
414 Green qPCR Kit (#F415S, Thermo Fisher Scientific) on a 96-well plate with gene-specific  
415 primers 10  $\mu$ M and H<sub>2</sub>O. The cycling protocol was 95°C for 7 min, then 40 cycles of 95°C for  
416 10 s and 60°C for 30 s. Normalization was done with *GAPDH* as a housekeeping gene using  
417  $\Delta\Delta$ cT method. Minimum of 3-4 technical samples were used for all studies. 12.5 ng of cDNA  
418 was used for hiPSC and 6.25 ng for neurons.

#### 419 **Immunocytochemistry**

420 Cells were washed three times with PBS, fixed with 4% paraformaldehyde for 15 min followed  
421 by three PBS washes. Cells were then permeabilized in 0.2% Triton X-100/PBS for 15 min at  
422 RT. Coverslips were washed three times in PBST (0.1% Tween-20) followed by block at RT  
423 with 5% BSA/PBST (#001-000-162, Jackson Immuno Research) for two hours. Primary  
424 antibody in 5% BSA/PBST was incubated overnight at 4°C. Following overnight incubation,



425 coverslips were washed with PBST for 15 min three times, followed by incubation in secondary  
426 antibody in 5% BSA/PBST for one hour. The cells were finally washed three times for 10 min  
427 and coverslips plated on glass with Vectashield containing DAPI (#H-1200, Vector  
428 Laboratories).

#### 429 **Antibodies**

430 Antibodies were used at the following dilutions: 1:200  $\alpha$ -rabbit N-terminal GANP antibody for  
431 immunocytochemistry was (#198173, Abcam) with secondary antibody 1:1000 (488 goat-anti-  
432 rabbit #A11008, Alexa or 594 goat-anti-rabbit #110012, Alexa). To detect  $\alpha$ -rabbit Nanog  
433 1:200 (#4903, Cell Signalling), secondary 488 goat-anti-rabbit 1:1000 (A11008, Alexa) was  
434 used. Neuronal antibodies used for immunocytochemistry used were: 1:200 mouse  $\alpha$ -Hb9  
435 (#81.5C10-C, DSHB) with secondary antibody 1:1000: (#A11007, Alexa), 1:200 chicken  $\alpha$ -  
436 MAP2 antibody (#AB5543, Millipore) with secondary antibody 1:1000 (#SA5-10070,  
437 Thermo). 1:1000 rabbit  $\alpha$ -histone H3 (#4499, Cell Signalling) with secondary antibody 1:1000:  
438 1:700 rabbit  $\alpha$ -NEFM antibody for immunocytochemistry and 1:1000 for Western blotting  
439 (#20664-1-AP, Proteintech), with secondary antibodies 1:1000 (A11008, Alexa) and (#111-  
440 035-144, Jackson), respectively. To visualize mouse  $\alpha$ -Isl1 1:200 (#39-4D5, DSHB),  
441 secondary 594 goat-anti-mouse was used 1:1000 (#A11007, Alexa). To visualize nuclear pores,  
442 mouse  $\alpha$ -Mab414 1:200 (#ab24609, Abcam) was used with secondary antibody 594 goat-anti-  
443 mouse 1:1000 (#A11007, Alexa). For Western blotting, rabbit  $\alpha$ -GAPDH 1:1000 (#14C10,  
444 Cell Signalling) with secondary 1:5000 (#111-035-144, Jackson) and mouse  $\alpha$ -NEFL 1:1000  
445 (#sc39073, Santa Cruz) with secondary 1:5000 (#115-035-146, Jackson).

#### 446 **Axon isolation**

447 Dissociated Accutase passaged single neurons d11 (400K) were plated in motor neuron  
448 differentiation media in 6 well hanging inserts with Boyden chamber device (1  $\mu$ m pore, Falcon  
449 Cell Culture Inserts, #10289270, Thermo) for axon isolation (d22) similar to recent protocols  
450 [4,18]. Transmembrane filters were coated on both sides with poly-d-lysine and only on bottom  
451 side with laminin. Somatodendritic compartment was removed by scraping with PBS. The filter  
452 top was then washed 10 times with PBS RT strongly pipetting and then filter containing axons  
453 on bottom side was cut from the insert and washed 1 time with cold PBS. For RNA, PBS was  
454 removed by aspiration after spinning down and continued to RNA extraction with Nucleospin  
455 RNA kit (#740955.50, Macherey-Nagel) (incubated in the first buffer for 15 min after

456 vortexing). Six filters combined into same conical tube for one technical replicate for RNA  
457 sequencing.

458 For isolating protein for validation by immunoblotting, the filter was then placed on ice  
459 following the washing steps and lysed in 30 uL RIPA containing Halt protease inhibitor  
460 (#1861284, Thermo) was added. All samples were vortexed and incubated on ice for 15 min.  
461 The samples were then centrifuged for 10 min at 14 000 x g in a cold centrifuge and supernatant  
462 was removed for protein. Three wells combined into same conical tube. Protein concentration  
463 was measured with BCA (#23227, Thermo).

#### 464 **Nuclei isolation for RNA and protein**

465 Neurons d22 (500K) were washed once with PBS RT, lysed in homogenizing buffer (0.3 M  
466 sucrose, 1 mM EGTA, 5 mM MOPS, 5 mM KH<sub>2</sub>PO<sub>4</sub>, pH 7.4). Cells were scraped and an  
467 aliquot was removed for total cell extract for protein samples. Cells were run through 22 G  
468 syringe and needle 8 times, an aliquot was taken for trypan blue staining and cells were  
469 observed under microscope for lysis. Cells were centrifuged 15 minutes at 6500 rpm at 4°C.  
470 Supernatant formed the cytoplasmic extract and pellet the nuclear extract. RNA was isolated  
471 with Nucleospin RNA kit (#740955.50, Macherey-Nagel) and RNA concentrations were  
472 measured with Denovix and TapeStation. For protein, nuclear and total cell extracts were lysed  
473 in 1 x RIPA with protease inhibitor, incubated on ice 5 min, centrifuged 14 000 x g for 10 min,  
474 removed supernatant for protein.

#### 475 **Protein extraction and Western blotting**

476 The cells were isolated with 1X RIPA (#9806, Cell Signalling) for 5 min on ice, scraped and  
477 centrifuged at 14 000 x g for 10 min at 4°C. Protein concentrations were measured with BCA  
478 (#23227, Thermo). For SDS-PAGE analysis, 5 µg of protein was loaded per well on a 10%  
479 TGX 10-well 30µl/well gel (456-1033, Bio-Rad) for 1 hr. at 150V. Molecular size of bands  
480 was detected with Protein Standard (#161-0374, Bio-Rad) and proteins loaded together with  
481 4x Laemmli loading buffer (#161-0747, Bio-Rad) in 2-mercaptoethanol (#1610710, Bio-Rad).  
482 Gel was transferred into a nitrocellulose membrane (#1704158, Bio-Rad) and transferred using  
483 Mixed Molecular Weight protocol in Trans-Blot Turbo (Bio-Rad). The blot was washed  
484 blocked in 5% milk/TBST for 1 hr in RT. For immunoblotting analysis, antibodies were  
485 incubated overnight in 4°C in 2,5% milk/BSA in TBST. The blot was washed three times for  
486 five min in TBST. Secondary HRP antibodies (1:5000) in 1% BSA/TBST was incubated for 1  
487 hr at RT on a shaker and washed three times 10 min in TBST. The blot was visualized with



488 ECL reaction (#K-12049-D50, Advansta). The images were obtained with a Chemidoc imager  
489 (Bio Rad) and quantified on Image Lab software (Bio-Rad). Results were visualized on Graph  
490 Pad Prism Software.

#### 491 **RNA sequencing and bioinformatics**

492 For total neuron population, RNA was isolated from 6-well plates of Accumax dissociated and  
493 cultured single neurons (500K) four independent wells grown in poly d lysine and laminin  
494 grown in culture for 22 days. Samples were sequenced and analysed for Kolf2\_c1 parental wild  
495 type and R878H/R878H knock-in line. Cells were washed with PBS once and RNA isolated  
496 from lysed cells Nucleospin RNA kit (#740955.50, Macherey-Nagel) according to  
497 manufacturer's instructions including rDNAse treatment. RNA concentrations were measured  
498 with Agilent TapeStation and Nanodrop, RNA integrity was checked on a gel with Agilent  
499 TapeStation.

500 The RNA-seq libraries were made with NEBNext Ultra II Directional (PolyA) kit and  
501 sequenced with NovaSeq SP 2x150bp (Illumina) at Biomedicum Functional Genomics Unit  
502 (FuGU). The raw data was filtered with cutadapt [37] to remove adapter sequences, ambiguous  
503 (N) and low quality bases (Phred score < 25). We also excluded read pairs that were too short  
504 (<25bp) after trimming. The filtered read pair were mapped to the human reference genome  
505 (GRCh38) with STAR aligner [6]. Gene expression was counted from read pairs mapping to  
506 exons using featureCount in Rsubreads [33]. Duplicates, chimeric and multimapping reads  
507 were excluded, as well as reads with low mapping score (MAPQ < 10). The read count data  
508 was analyzed with DESeq2 [35]. We analyzed the effect of R878H/R878H mutation in  
509 *MCM3AP* by comparing the mutant samples to the parental cell line, separately for each sample  
510 type (total RNA, nuclear RNA and axonal RNA). We removed genes with low expression  
511 levels from the analysis (<50 reads across all samples). PCA was calculated with prcomp using  
512 variance stabilizing transformation (vst) on the read counts. The differentially expressed genes  
513 (FDR<0.01) were analyzed for enrichment separately for the up- and down-regulated genes  
514 using clusterProfiler [64] against the Reactome pathways [8], KEGG [22], Gene ontology [53]  
515 and Disease ontology [48]. For background genes we used all the genes that were detected as  
516 expressed in the samples (above the low coverage cutoff, >50 reads). We analyzed alternative  
517 splicing dynamics with KisSplice [44]. The results from the gene expression analysis together  
518 with the raw sequences were deposited to GEO, under accession GSE162781.

#### 519 **RNAScope**

520 RNA *in situ* hybridization was performed on fixed adherent hiPSCs grown on coverslips using  
521 RNAscope Multiplex Fluorescent Reagent Kit V2 (#323100, Advanced Cell Diagnostics) for  
522 target detection according to the manual. Briefly, 4% paraformaldehyde fixed cells were  
523 dehydrated in increasing ethanol concentrations (50%, 70%), and stored in 100% EtOH at -  
524 20°C. The day of RNA *in situ* hybridization, were cells rehydrated in decreasing concentrations  
525 of ethanol (70%, 50%) and in PBS. Then treated with hydrogen peroxide for 10 min at RT,  
526 washed with distilled water, and treated with 1:30 diluted protease III for 10 min at RT, and  
527 washed with PBS. Probes Hs PRIMA1 (ACD, #900601) were hybridized for 2 h at 40°C  
528 followed by signal amplification and developing the HRP channel with TSA Plus fluorophore  
529 Cyanine 3 (1:1500) (NEL744001KT, Perkin Elmer) according to the manual. Cells were  
530 counterstained with DAPI and mounted with ProLong Gold Antifade Mountant (#P36930,  
531 Invitrogen). Cells were imaged with Zeiss Axio Observer microscope (Zeiss, Germany) with a  
532 20X air objective and Apotome.2.

### 533 **Axon regeneration assay**

534 Neurons were plated and axons grown on microfluidic chips (#XC450, Xona microfluidics).  
535 To dissociate, axons were washed with media until they detached. Axon growth was visualized  
536 by light microscopy on days 21-23 of differentiation, before and after axotomy. Axon masks  
537 from images were generated with Fiji.

### 538 **Measurement of NEFL from culture medium**

539 For measurement of NEFL, 1 mL of culture medium was collected from single 6-well neuronal  
540 cultures (4 technical replicates) at day 23 of neuronal differentiation. Samples were centrifuged  
541 at 13000 x g for 10 min in a cold centrifuge and supernatant frozen in -20°C. NEFL levels were  
542 quantified using the Quanterix single molecule array [43] (Simoa, Billerica, MA, USA) HD-1  
543 analyzer and Quanterix Simoa NF-Light Advantage Kit (ref. 103186) according to  
544 manufacturer's instructions. Briefly, frozen medium samples were slowly thawed on ice, mixed,  
545 and centrifuged at 10000g for 5 min at room temperature and diluted 1:50 in sample diluent  
546 prior to loading to a 96-well plate. Samples were measured in duplicate. All measured  
547 concentrations were within the calibration range and the mean coefficient of variation (CV) of  
548 sample replicates was 4.5%. A CV of <15% was considered acceptable between the replicates.  
549 The data are shown as mean of the replicate samples  $\pm$  SD (pg/mL).

### 550 **Statistics**

551 One-way ANOVA was used for comparing means between different groups and unpaired two-  
552 tailed t-test for comparisons of two groups. Significance was measured by  $p < 0.05$  in qRT-PCR  
553 and axon microfluidics experiments. Statistical tests were performed in Graph Pad Prism  
554 7.04/8.03. All measured data points were included in the analysis.

## 555 **ACKNOWLEDGEMENTS**

556 Riitta Lehtinen, Jana Pennonen and Anni Laitinen are thanked for technical assistance. We  
557 thank Tarja Kokkola, PhD, at UEF Biomarker Laboratory, Kuopio, Finland, for her kind help  
558 and advice on the Simoa-based medium NEFL measurements. We acknowledge Biomedicum  
559 Functional Genomics Unit of the Institute of Biotechnology, University of Helsinki, and  
560 Biocenter Finland Stem Cell Center. Funding: This work was supported by Doctoral  
561 Programme Brain & Mind (RW), UEF Doctoral Program in Molecular Medicine (NH),  
562 University of Helsinki (EY, HT), Academy of Finland (EY, HT, AH), Instrumentarium Science  
563 Foundation (RW), HUS Helsinki University Hospital (EY), Emil Aaltonen Foundation (EY)  
564 and Sigrid Juselius Foundation (HT).

565

## 566 **AUTHOR CONTRIBUTIONS**

567 RW, EY, JS and HT conceived the ideas and planned the experiments. RW, MS, MTS, SH  
568 developed and modified the methodologies used. JK did the bioinformatics analysis and  
569 implemented the codes. RW, MS and NH completed and validated the experiments and did the  
570 formal analyses. NH, S-K.H and AH produced the NEFL data. SHä conducted RNAScope  
571 experiment which OC supervised. RT-M participated in AxonSeq experiment. RW gene edited  
572 hiPSC, which JS, MW and AB supervised. RW, MS, JK prepared the figures and visualization  
573 of the data. RW wrote the initial manuscript and HT and JS reviewed and edited the draft. All  
574 authors reviewed the final manuscript.

575

## 576 **CONFLICTS OF INTEREST STATEMENT**

577 The authors report no conflicts of interest.

## 578 **SUPPLEMENTAL INFORMATION**

579 **Supplemental table 1.**

580 Differential expression analysis results.

581 **Supplemental table 2.**

582 Gene-set enrichment analysis results.

583 **Supplemental table 3.**

584 Splicing analysis results.

585 **Supplemental table 4.**

586 Gene-set enrichment analysis results for splicing changes.

587 **REFERENCES**

- 588 1. Aksenova V, Smith A, Lee H, Bhat P, Esnault C, Chen S, Iben J, Kaufhold R, Yau KC,  
589 Echeverria C, Fontoura B, Arnaoutov A, Dasso M (2020) Nucleoporin TPR is an integral  
590 component of the TREX-2 mRNA export pathway. *Nat Commun* 11: 4577-020-18266-2.  
591 Doi:10.1038/s41467-020-18266-2 [doi].
- 592 2. Briese M, Saal L, Appenzeller S, Moradi M, Baluapuri A, Sendtner M (2016) Whole  
593 transcriptome profiling reveals the RNA content of motor axons. *Nucleic Acids Res* 44: e33.  
594 Doi:10.1093/nar/gkv1027 [doi].
- 595 3. Bruntraeger M, Byrne M, Long K, Bassett AR (2019) Editing the Genome of Human  
596 Induced Pluripotent Stem Cells Using CRISPR/Cas9 Ribonucleoprotein Complexes. *Methods*  
597 *Mol Biol* 1961: 153-183. Doi:10.1007/978-1-4939-9170-9\_11 [doi].
- 598 4. Cagnetta R, Frese CK, Shigeoka T, Krijgsveld J, Holt CE (2018) Rapid Cue-Specific  
599 Remodeling of the Nascent Axonal Proteome. *Neuron* 99: 29-46.e4. Doi:S0896-  
600 6273(18)30472-0 [pii].
- 601 5. Cioni JM, Lin JQ, Holtermann AV, Koppers M, Jakobs MAH, Azizi A, Turner-Bridger B,  
602 Shigeoka T, Franze K, Harris WA, Holt CE (2019) Late Endosomes Act as mRNA  
603 Translation Platforms and Sustain Mitochondria in Axons. *Cell* 176: 56-72.e15. Doi:S0092-  
604 8674(18)31555-1 [pii].
- 605 6. Dobin A, Davis CA, Schlesinger F, Drenkow J, Zaleski C, Jha S, Batut P, Chaisson M,  
606 Gingeras TR (2013) STAR: ultrafast universal RNA-seq aligner. *Bioinformatics* 29: 15-21.  
607 Doi:10.1093/bioinformatics/bts635 [doi].
- 608 7. Ducker GS, Rabinowitz JD (2017) One-Carbon Metabolism in Health and Disease. *Cell*  
609 *Metab* 25: 27-42. Doi:S1550-4131(16)30425-9 [pii].
- 610 8. Fabregat A, Jupe S, Matthews L, Sidiropoulos K, Gillespie M, Garapati P, Haw R, Jassal  
611 B, Korninger F, May B, Milacic M, Roca CD, Rothfels K, Sevilla C, Shamovsky V, Shorser  
612 S, Varusai T, Viteri G, Weiser J, Wu G, Stein L, Hermjakob H, D'Eustachio P (2018) The

- 613 Reactome Pathway Knowledgebase. *Nucleic Acids Res* 46: D649-D655.  
614 Doi:10.1093/nar/gkx1132 [doi].
- 615 9. Fischer T, Strasser K, Racz A, Rodriguez-Navarro S, Oppizzi M, Ihrig P, Lechner J, Hurt  
616 E (2002) The mRNA export machinery requires the novel Sac3p-Thp1p complex to dock at  
617 the nucleoplasmic entrance of the nuclear pores. *EMBO J* 21: 5843-5852.  
618 Doi:10.1093/emboj/cdf590 [doi].
- 619 10. Folkmann AW, Collier SE, Zhan X, Aditi, Ohi MD, Wentz SR (2013) Gle1 functions  
620 during mRNA export in an oligomeric complex that is altered in human disease. *Cell* 155:  
621 582-593. Doi:10.1016/j.cell.2013.09.023 [doi].
- 622 11. Forsstrom S, Jackson CB, Carroll CJ, Kuronen M, Pirinen E, Pradhan S, Marmyleva A,  
623 Auranen M, Kleine IM, Khan NA, Roivainen A, Marjamaki P, Liljenback H, Wang L,  
624 Battersby BJ, Richter U, Velagapudi V, Nikkanen J, Euro L, Suomalainen A (2019)  
625 Fibroblast Growth Factor 21 Drives Dynamics of Local and Systemic Stress Responses in  
626 Mitochondrial Myopathy with mtDNA Deletions. *Cell Metab* 30: 1040-1054.e7. Doi:S1550-  
627 4131(19)30448-6 [pii].
- 628 12. Gallardo M, Aguilera A (2001) A new hyperrecombination mutation identifies a novel  
629 yeast gene, THP1, connecting transcription elongation with mitotic recombination. *Genetics*  
630 157: 79-89.
- 631 13. Goodall GJ, Wickramasinghe VO (2020) RNA in cancer. *Nat Rev Cancer*  
632 Doi:10.1038/s41568-020-00306-0 [doi].
- 633 14. Gumy LF, Yeo GS, Tung YC, Zivraj KH, Willis D, Coppola G, Lam BY, Twiss JL, Holt  
634 CE, Fawcett JW (2011) Transcriptome analysis of embryonic and adult sensory axons reveals  
635 changes in mRNA repertoire localization. *RNA* 17: 85-98. Doi:10.1261/rna.2386111 [doi].
- 636 15. Guo W, Naujock M, Fumagalli L, Vandoorne T, Baatsen P, Boon R, Ordovas L, Patel A,  
637 Welters M, Vanwelden T, Geens N, Tricot T, Benoy V, Steyaert J, Lefebvre-Omar C,  
638 Boesmans W, Jarpe M, Sternecker J, Wegner F, Petri S, Bohl D, Vanden Berghe P,  
639 Robberecht W, Van Damme P, Verfaillie C, Van Den Bosch L (2017) HDAC6 inhibition  
640 reverses axonal transport defects in motor neurons derived from FUS-ALS patients. *Nat*  
641 *Commun* 8: 861-017-00911-y. Doi:10.1038/s41467-017-00911-y [doi].
- 642 16. Hathazi D, Griffin H, Jennings MJ, Giunta M, Powell C, Pearce SF, Munro B, Wei W,  
643 Boczonadi V, Poulton J, Pyle A, Calabrese C, Gomez-Duran A, Schara U, Pitceathly RDS,  
644 Hanna MG, Joost K, Cotta A, Paim JF, Navarro MM, Duff J, Mattman A, Chapman K,  
645 Servidei S, Della Marina A, Uusimaa J, Roos A, Mootha V, Hirano M, Tulinius M, Giri M,  
646 Hoffmann EP, Lochmuller H, DiMauro S, Minczuk M, Chinnery PF, Muller JS, Horvath R  
647 (2020) Metabolic shift underlies recovery in reversible infantile respiratory chain deficiency.  
648 *EMBO J* 39: e105364. Doi:10.15252/embj.2020105364 [doi].
- 649 17. Helmlinger D, Tora L (2017) Sharing the SAGA. *Trends Biochem Sci* 42: 850-861.  
650 Doi:S0968-0004(17)30168-8 [pii].
- 651 18. Hudish LI, Bubak A, Triolo TM, Niemeyer CS, Sussel L, Nagel M, Taliaferro JM, Russ  
652 HA (2020) Modeling Hypoxia-Induced Neuropathies Using a Fast and Scalable Human

- 653 Motor Neuron Differentiation System. *Stem Cell Reports* 14: 1033-1043. Doi:S2213-  
654 6711(20)30143-0 [pii].
- 655 19. Jaffrey SR, Wilkinson MF (2018) Nonsense-mediated RNA decay in the brain: emerging  
656 modulator of neural development and disease. *Nat Rev Neurosci* 19: 715-728.  
657 Doi:10.1038/s41583-018-0079-z [doi].
- 658 20. Jani D, Lutz S, Hurt E, Laskey RA, Stewart M, Wickramasinghe VO (2012) Functional  
659 and structural characterization of the mammalian TREX-2 complex that links transcription  
660 with nuclear messenger RNA export. *Nucleic Acids Res* 40: 4562-4573.  
661 Doi:10.1093/nar/gks059 [doi].
- 662 21. Kaneb HM, Folkmann AW, Belzil VV, Jao LE, Leblond CS, Girard SL, Daoud H,  
663 Noreau A, Rochefort D, Hince P, Szuto A, Levert A, Vidal S, Andre-Guimont C, Camu W,  
664 Bouchard JP, Dupre N, Rouleau GA, Wenthe SR, Dion PA (2015) Deleterious mutations in  
665 the essential mRNA metabolism factor, hGle1, in amyotrophic lateral sclerosis. *Hum Mol*  
666 *Genet* 24: 1363-1373. Doi:10.1093/hmg/ddu545 [doi].
- 667 22. Kanehisa M, Goto S (2000) KEGG: kyoto encyclopedia of genes and genomes. *Nucleic*  
668 *Acids Res* 28: 27-30. Doi:gkd027 [pii].
- 669 23. Karakaya M, Mazaheri N, Polat I, Bharucha-Goebel D, Donkervoort S, Maroofian R,  
670 Shariati G, Hoelker I, Monaghan K, Winchester S, Zori R, Galehdari H, Bonnemann CG, Yis  
671 U, Wirth B (2017) Biallelic MCM3AP mutations cause Charcot-Marie-Tooth neuropathy  
672 with variable clinical presentation. *Brain* 140: e65. Doi:10.1093/brain/awx222 [doi].
- 673 24. Kennerson ML, Corbett AC, Ellis M, Perez-Siles G, Nicholson GA (2018) A novel  
674 MCM3AP mutation in a Lebanese family with recessive Charcot-Marie-Tooth neuropathy.  
675 *Brain* Doi:10.1093/brain/awy184 [doi].
- 676 25. Khalil M, Teunissen CE, Otto M, Piehl F, Sormani MP, Gattringer T, Barro C, Kappos L,  
677 Comabella M, Fazekas F, Petzold A, Blennow K, Zetterberg H, Kuhle J (2018)  
678 Neurofilaments as biomarkers in neurological disorders. *Nat Rev Neurol* 14: 577-589.  
679 Doi:10.1038/s41582-018-0058-z [doi].
- 680 26. Kilpinen H, Goncalves A, Leha A, Afzal V, Alasoo K, Ashford S, Bala S, Bensaddek D,  
681 Casale FP, Culley OJ, Danecek P, Faulconbridge A, Harrison PW, Kathuria A, McCarthy D,  
682 McCarthy SA, Meleckyte R, Memari Y, Moens N, Soares F, Mann A, Streeter I, Agu CA,  
683 Alderton A, Nelson R, Harper S, Patel M, White A, Patel SR, Clarke L, Halai R, Kirton CM,  
684 Kolb-Kokocinski A, Beales P, Birney E, Danovi D, Lamond AI, Ouwehand WH, Vallier L,  
685 Watt FM, Durbin R, Stegle O, Gaffney DJ (2017) Common genetic variation drives  
686 molecular heterogeneity in human iPSCs. *Nature* 546: 370-375. Doi:10.1038/nature22403  
687 [doi].
- 688 27. Klim JR, Williams LA, Limone F, Guerra San Juan I, Davis-Dusenbery BN, Mordes DA,  
689 Burberry A, Steinbaugh MJ, Gamage KK, Kirchner R, Moccia R, Cassel SH, Chen K,  
690 Wainger BJ, Woolf CJ, Eggan K (2019) ALS-implicated protein TDP-43 sustains levels of  
691 STMN2, a mediator of motor neuron growth and repair. *Nat Neurosci* 22: 167-179.  
692 Doi:10.1038/s41593-018-0300-4 [doi].



- 693 28. Koutelou E, Hirsch CL, Dent SY (2010) Multiple faces of the SAGA complex. *Curr Opin*  
694 *Cell Biol* 22: 374-382. Doi:10.1016/j.ceb.2010.03.005 [doi].
- 695 29. Kurshakova MM, Krasnov AN, Kopytova DV, Shidlovskii YV, Nikolenko JV,  
696 Nabirochkina EN, Spehner D, Schultz P, Tora L, Georgieva SG (2007) SAGA and a novel  
697 Drosophila export complex anchor efficient transcription and mRNA export to NPC. *EMBO*  
698 *J* 26: 4956-4965. Doi:7601901 [pii].
- 699 30. Kuwahara K, Yoshida M, Kondo E, Sakata A, Watanabe Y, Abe E, Kouno Y, Tomiyasu  
700 S, Fujimura S, Tokuhisa T, Kimura H, Ezaki T, Sakaguchi N (2000) A novel nuclear  
701 phosphoprotein, GANP, is up-regulated in centrocytes of the germinal center and associated  
702 with MCM3, a protein essential for DNA replication. *Blood* 95: 2321-2328.
- 703 31. Lee ES, Wolf EJ, Ihn SSJ, Smith HW, Emili A, Palazzo AF (2020) TPR is required for  
704 the efficient nuclear export of mRNAs and lncRNAs from short and intron-poor genes.  
705 *Nucleic Acids Res* Doi:gkaa919 [pii].
- 706 32. Leha A, Moens N, Meleckyte R, Culley OJ, Gervasio MK, Kerz M, Reimer A, Cain SA,  
707 Streeter I, Folarin A, Stegle O, Kielty CM, HipSci Consortium, Durbin R, Watt FM, Danovi  
708 D (2016) A high-content platform to characterise human induced pluripotent stem cell lines.  
709 *Methods* 96: 85-96. Doi:S1046-2023(15)30153-5 [pii].
- 710 33. Liao Y, Smyth GK, Shi W (2019) The R package Rsubread is easier, faster, cheaper and  
711 better for alignment and quantification of RNA sequencing reads. *Nucleic Acids Res* 47: e47.  
712 Doi:10.1093/nar/gkz114 [doi].
- 713 34. Lin JQ, van Tartwijk FW, Holt CE (2020) Axonal mRNA translation in neurological  
714 disorders. *RNA Biol*: 1-26. Doi:10.1080/15476286.2020.1822638 [doi].
- 715 35. Love MI, Huber W, Anders S (2014) Moderated estimation of fold change and dispersion  
716 for RNA-seq data with DESeq2. *Genome Biol* 15: 550-014-0550-8. Doi:s13059-014-0550-8  
717 [pii].
- 718 36. Maciel R, Bis DM, Rebelo AP, Saghira C, Zuchner S, Saporta MA (2018) The human  
719 motor neuron axonal transcriptome is enriched for transcripts related to mitochondrial  
720 function and microtubule-based axonal transport. *Exp Neurol* 307: 155-163. Doi:S0014-  
721 4886(18)30198-5 [pii].
- 722 37. Martin M (2011) Cutadapt removes adapter sequences from high-throughput sequencing  
723 reads. *EMBnet.journal* 17 Doi:10.14806/ej.17.1.200.
- 724 38. Nijssen J, Aguila J, Hoogstraaten R, Kee N, Hedlund E (2018) Axon-Seq Decodes the  
725 Motor Axon Transcriptome and Its Modulation in Response to ALS. *Stem Cell Reports* 11:  
726 1565-1578. Doi:S2213-6711(18)30473-9 [pii].
- 727 39. Nousiainen HO, Kestila M, Pakkasjarvi N, Honkala H, Kuure S, Tallila J, Vuopala K,  
728 Ignatius J, Herva R, Peltonen L (2008) Mutations in mRNA export mediator GLE1 result in a  
729 fetal motoneuron disease. *Nat Genet* 40: 155-157. Doi:10.1038/ng.2007.65 [doi].

- 730 40. Ostroff LE, Santini E, Sears R, Deane Z, Kanadia RN, LeDoux JE, Lhaxhang T, Tsirigos  
731 A, Heguy A, Klann E (2019) Axon TRAP reveals learning-associated alterations in cortical  
732 axonal mRNAs in the lateral amygdala. *Elife* 8: 10.7554/eLife.51607.  
733 Doi:10.7554/eLife.51607 [doi].
- 734 41. Perrier AL, Massoulie J, Krejci E (2002) PRiMA: the membrane anchor of  
735 acetylcholinesterase in the brain. *Neuron* 33: 275-285. Doi:S0896627301005840 [pii].
- 736 42. Reed R, Cheng H (2005) TREX, SR proteins and export of mRNA. *Curr Opin Cell Biol*  
737 17: 269-273. Doi:S0955-0674(05)00053-0 [pii].
- 738 43. Rissin DM, Kan CW, Campbell TG, Howes SC, Fournier DR, Song L, Piech T, Patel PP,  
739 Chang L, Rivnak AJ, Ferrell EP, Randall JD, Provuncher GK, Walt DR, Duffy DC (2010)  
740 Single-molecule enzyme-linked immunosorbent assay detects serum proteins at  
741 subfemtomolar concentrations. *Nat Biotechnol* 28: 595-599. Doi:10.1038/nbt.1641 [doi].
- 742 44. Sacomoto GA, Kielbassa J, Chikhi R, Uricaru R, Antoniou P, Sagot MF, Peterlongo P,  
743 Lacroix V (2012) KISSPLICE: de-novo calling alternative splicing events from RNA-seq  
744 data. *BMC Bioinformatics* 13 Suppl 6: S5-2105-13-S6-S5. Doi:10.1186/1471-2105-13-S6-S5  
745 [doi].
- 746 45. Sainio MT, Ylikallio E, Maenpaa L, Lahtela J, Mattila P, Auranen M, Palmio J,  
747 Tyyntymaa H (2018) Absence of NEFL in patient-specific neurons in early-onset Charcot-  
748 Marie-Tooth neuropathy. *Neurol Genet* 4: e244. Doi:10.1212/NXG.0000000000000244  
749 [doi].
- 750 46. Sakai Y, Rezano A, Okada S, Ohtsuki T, Kawashima Y, Tsukamoto T, Suzuki M, Kohara  
751 M, Takeya M, Sakaguchi N, Kuwahara K (2020) A Novel Cytological Model of B-  
752 Cell/Macrophage Biphenotypic Cell Hodgkin Lymphoma in Ganp-Transgenic Mice. *Cancers*  
753 (Basel) 12: 10.3390/cancers12010204. Doi:E204 [pii].
- 754 47. Schlattner U, Klaus A, Ramirez Rios S, Guzun R, Kay L, Tokarska-Schlattner M (2016)  
755 Cellular compartmentation of energy metabolism: creatine kinase microcompartments and  
756 recruitment of B-type creatine kinase to specific subcellular sites. *Amino Acids* 48: 1751-  
757 1774. Doi:10.1007/s00726-016-2267-3 [doi].
- 758 48. Schriml LM, Arze C, Nadendla S, Chang YW, Mazaitis M, Felix V, Feng G, Kibbe WA  
759 (2012) Disease Ontology: a backbone for disease semantic integration. *Nucleic Acids Res* 40:  
760 D940-6. Doi:10.1093/nar/gkr972 [doi].
- 761 49. Schuurs-Hoeijmakers JH, Vulto-van Silfhout AT, Vissers LE, van de V,II, van Bon BW,  
762 de Ligt J, Gilissen C, Hehir-Kwa JY, Neveling K, del Rosario M, Hira G, Reitano S, Vitello  
763 A, Failla P, Greco D, Fichera M, Galesi O, Kleefstra T, Grealley MT, Ockeloen CW,  
764 Willemsen MH, Bongers EM, Janssen IM, Pfundt R, Veltman JA, Romano C, Willemsen  
765 MA, van Bokhoven H, Brunner HG, de Vries BB, de Brouwer AP (2013) Identification of  
766 pathogenic gene variants in small families with intellectually disabled siblings by exome  
767 sequencing. *J Med Genet* 50: 802-811. Doi:10.1136/jmedgenet-2013-101644 [doi].



- 768 50. Sreedharan J, Neukomm LJ, Brown RH, Jr, Freeman MR (2015) Age-Dependent TDP-43-  
769 Mediated Motor Neuron Degeneration Requires GSK3, hat-trick, and xmas-2. *Curr Biol* 25:  
770 2130-2136. Doi:10.1016/j.cub.2015.06.045 [doi].
- 771 51. Stewart M (2019) Polyadenylation and nuclear export of mRNAs. *J Biol Chem* 294:  
772 2977-2987. Doi:10.1074/jbc.REV118.005594 [doi].
- 773 52. Taylor AM, Berchtold NC, Perreau VM, Tu CH, Li Jeon N, Cotman CW (2009) Axonal  
774 mRNA in uninjured and regenerating cortical mammalian axons. *J Neurosci* 29: 4697-4707.  
775 Doi:10.1523/JNEUROSCI.6130-08.2009 [doi].
- 776 53. The Gene Ontology Consortium (2019) The Gene Ontology Resource: 20 years and still  
777 GOing strong. *Nucleic Acids Res* 47: D330-D338. Doi:10.1093/nar/gky1055 [doi].
- 778 54. Umlauf D, Bonnet J, Waharte F, Fournier M, Stierle M, Fischer B, Brino L, Devys D,  
779 Tora L (2013) The human TREX-2 complex is stably associated with the nuclear pore basket.  
780 *J Cell Sci* 126: 2656-2667. Doi:10.1242/jcs.118000 [doi].
- 781 55. Vandoorne T, Veys K, Guo W, Sicart A, Vints K, Swijssen A, Moisse M, Eelen G,  
782 Gounko NV, Fumagalli L, Fazal R, Germeys C, Quaegebeur A, Fendt SM, Carmeliet P,  
783 Verfaillie C, Van Damme P, Ghesquiere B, De Bock K, Van Den Bosch L (2019)  
784 Differentiation but not ALS mutations in FUS rewires motor neuron metabolism. *Nat*  
785 *Commun* 10: 4147-019-12099-4. Doi:10.1038/s41467-019-12099-4 [doi].
- 786 56. Weyn-Vanhentenryck SM, Feng H, Ustianenko D, Duffie R, Yan Q, Jacko M, Martinez  
787 JC, Goodwin M, Zhang X, Hengst U, Lomvardas S, Swanson MS, Zhang C (2018) Precise  
788 temporal regulation of alternative splicing during neural development. *Nat Commun* 9: 2189-  
789 018-04559-0. Doi:10.1038/s41467-018-04559-0 [doi].
- 790 57. Wickramasinghe VO, Laskey RA (2015) Control of mammalian gene expression by  
791 selective mRNA export. *Nat Rev Mol Cell Biol* 16: 431-442. Doi:10.1038/nrm4010 [doi].
- 792 58. Wickramasinghe VO, Andrews R, Ellis P, Langford C, Gurdon JB, Stewart M,  
793 Venkitaraman AR, Laskey RA (2014) Selective nuclear export of specific classes of mRNA  
794 from mammalian nuclei is promoted by GANP. *Nucleic Acids Res* 42: 5059-5071.  
795 Doi:10.1093/nar/gku095 [doi].
- 796 59. Wickramasinghe VO, McMurtrie PI, Mills AD, Takei Y, Penrhyn-Lowe S, Amagase Y,  
797 Main S, Marr J, Stewart M, Laskey RA (2010) mRNA export from mammalian cell nuclei is  
798 dependent on GANP. *Curr Biol* 20: 25-31. Doi:10.1016/j.cub.2009.10.078 [doi].
- 799 60. Willis DE, van Niekerk EA, Sasaki Y, Mesngon M, Merianda TT, Williams GG, Kendall  
800 M, Smith DS, Bassell GJ, Twiss JL (2007) Extracellular stimuli specifically regulate  
801 localized levels of individual neuronal mRNAs. *J Cell Biol* 178: 965-980. Doi:jcb.200703209  
802 [pii].
- 803 61. Woldegebriel R, Kvist J, Andersson N, Ounap K, Reinson K, Wojcik MH, Bijlsma EK,  
804 Hoffer MJV, Ryan MM, Stark Z, Walsh M, Cuppen I, van den Boogaard MH, Bharucha-  
805 Goebel D, Donkervoort S, Winchester S, Zori R, Bonnemann CG, Maroofian R, O'Connor E,  
806 Houlden H, Zhao F, Carpen O, White M, Sreedharan J, Stewart M, Ylikallio E, Tyynismaa H

807 (2020) Distinct effects on mRNA export factor GANP underlie neurological disease  
808 phenotypes and alter gene expression depending on intron content. *Hum Mol Genet* 29: 1426-  
809 1439. Doi:10.1093/hmg/ddaa051 [doi].

810 62. Ylikallio E, Woldegebriel R, Tyynismaa H (2018) Reply: A novel MCM3AP mutation in  
811 a Lebanese family with recessive Charcot-Marie-Tooth neuropathy. *Brain*  
812 Doi:10.1093/brain/awy185 [doi].

813 63. Ylikallio E, Woldegebriel R, Tumiati M, Isohanni P, Ryan MM, Stark Z, Walsh M,  
814 Sawyer SL, Bell KM, Oshlack A, Lockhart PJ, Shcherbii M, Estrada-Cuzcano A, Atkinson  
815 D, Hartley T, Tetreault M, Cuppen I, van der Pol WL, Candayan A, Battaloglu E, Parman Y,  
816 van Gassen KLI, van den Boogaard MH, Boycott KM, Kauppi L, Jordanova A, Lonnqvist T,  
817 Tyynismaa H (2017) MCM3AP in recessive Charcot-Marie-Tooth neuropathy and mild  
818 intellectual disability. *Brain* 140: 2093-2103. Doi:10.1093/brain/awx138 [doi].

819 64. Yu G, Wang LG, Han Y, He QY (2012) clusterProfiler: an R package for comparing  
820 biological themes among gene clusters. *OMICS* 16: 284-287. Doi:10.1089/omi.2011.0118  
821 [doi].

822

823

## 824 LEGENDS TO FIGURES

### 825 **Figure 1. GANP-deficient hiPSC are pluripotent.**

826 a. Cell lines used in this study. Gene editing was used to generate the homozygous R878H Sac3  
827 domain mutation in *MCM3AP* (GANP) on Kolf2\_c1 parental hiPSC line, which was used as  
828 the isogenic control. In addition, fibroblasts from two FIN patients carrying P148fs\*/V1272M  
829 were reprogrammed, and compared to healthy control hiPSC. b. Localization of the modelled  
830 disease variants in GANP domains. c. Immunocytochemistry to validate pluripotency with  
831 Nanog. DAPI indicates nuclei. Scale bar 50  $\mu$ m. d. qRT-PCR of pluripotency markers *OCT4*,  
832 *NANOG*, *C-MYC* and *SOX2* relative to *GAPDH* expression (n=4-6). Fibroblasts are shown as  
833 a negative control. Patient values are relative to controls' and R878H/R878H to parental  
834 average. e. Immunocytochemistry of GANP in hiPSC lines. Scale bar 50  $\mu$ m. f. qRT-PCR of  
835 *MCM3AP* expression relative to *GAPDH* (n=3-6) in hiPSC. \* p<0.05, \*\*\* p<0.0001.

### 836 **Figure 2. GANP-deficient hiPSC differentiate normally into motor neurons.**

837 a. hiPSC lines were differentiated into motor neurons. b. Gene expression validation of motor  
838 neuron transcripts *CHAT* and *ISL1* and neural transcript *NEFH* and *TUBB3* relative to *GAPDH*  
839 by qRT-PCR on day 23 of motor neuron differentiation (n=6 per clone). Patient lines compared  
840 to controls' average and R878H/R878H to parental average. c. Immunocytochemistry of

841 ISL1/2 (red) and NEFM (green) in neuronal cultures on day 23. d. Immunostaining of HB9  
842 (red) and MAP2 (green). Scale bars 50  $\mu$ m. ns = not significant.

### 843 **Figure 3. GANP localization and expression in human motor neurons**

844 a. Immunocytochemistry of GANP (red) in MAP2 (green) positive neuronal cultures. DAPI  
845 stains for nuclei shown in blue. Scale bar 50  $\mu$ m. b. Expression of *MCM3AP* in motor neurons  
846 analysed by qRT-PCR, relative to *GAPDH* (n=3-6 per clone). c. Immunocytochemistry of  
847 nuclear pore marker Mab414 (red) and neuronal marker MAP2 (green). DAPI is shown in blue.  
848 Scale bar 50  $\mu$ m. \*\* p<0.001.

### 849 **Figure 4. GANP is a major regulator of gene expression in human motor neurons.**

850 a. Schematic of workflow used for RNA sequencing experiments. b. Validation of nuclear and  
851 axonal isolations by western blotting of histone H3 (20 kDa), GAPDH (37 kDa), and NEFM  
852 (150 kDa). SD=somatodendritic fraction. c. Principal component analysis of RNA sequencing  
853 datasets. d. Density plot of differentially expressed genes in total neuron population and nuclear  
854 and axonal fractions. e. Venn diagram of the differentially expressed genes across the three  
855 different RNA sequencing datasets. f. Gene-set enrichment analysis of altered Reactome  
856 pathways.

### 857 **Figure 5. Heatmap of selected differentially expressed genes in GANP-deficient motor** 858 **neurons**

859 The heatmap shows representative genes from multiple enriched Reactome categories. To  
860 highlight differences among samples, the expression values (log<sub>1p</sub> FPKM) were scaled to gene  
861 averages separately for each sample type (total, nucleus and axon).

### 862 **Figure 6. Nuclear mRNA retention in GANP-deficient motor neurons**

863 a. mRNA expression of *NEFL* and *NEFM* in motor neurons by qRT-PCR, relative to *GAPDH*.  
864 b. NEFL measurement from neuronal culture medium. c. Axon regeneration assay. Images  
865 shown from 24 hrs before axotomy, immediately following axotomy and 24/48 hrs post-  
866 axotomy. One device analysed per line. Scale bar 100  $\mu$ m. c. Quantification of axon thickness  
867 from light microscopy images 24 hrs before axotomy. d. Fold changes of genes that were  
868 upregulated in nuclear fraction and downregulated in axons, suggestive of nuclear mRNA  
869 retention e. RNA *in situ* hybridization of *PRIMA1* mRNA foci in motor neurons (orange).  
870 DAPI (blue) stains the nuclei. \* p<0.05, \*\* p<0.001, \*\*\*p<0.0001.

871 **Figure 7. GANP regulates gene splicing in motor neurons**

872 a. Volcano plot of splicing changes and types in total and nuclear RNA sequencing. b. Venn  
873 diagram indicating the numbers of differentially expressed and spliced genes in total RNA  
874 sequencing. c. Venn diagram indicating the numbers of differentially expressed and spliced  
875 genes in the nuclear compartment. d. Box plot indicating exon inclusion percentages in  
876 *GABRG2*. Sashimi plot around alternatively spliced exon. The values on the lines indicate the  
877 read counts for junction reads (reads that maps partially to more than one exon). The location  
878 of the splicing event is indicated with the refseq models.

879 **Supplementary Figure 1. Increased expression of pluripotency marker *NANOG* in iPSC.**

880 qRT-PCR of *MCM3AP* and pluripotency marker *NANOG* in different gene-edited iPSC lines.

881 \*  $p < 0.05$ , \*\*\*  $p < 0.0001$ .

882

883

884

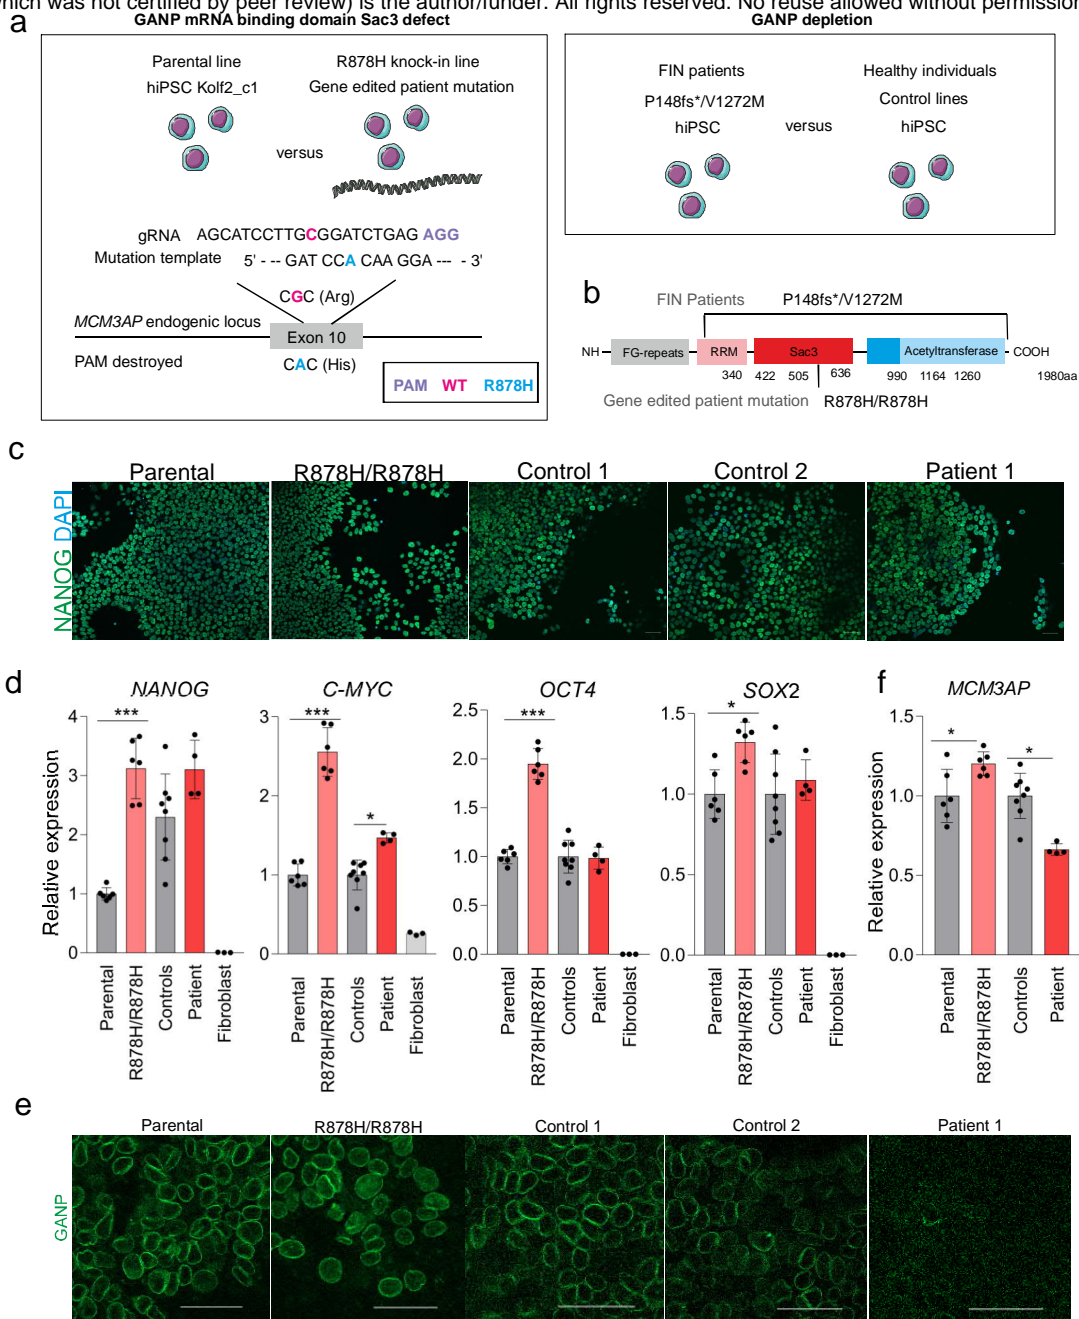



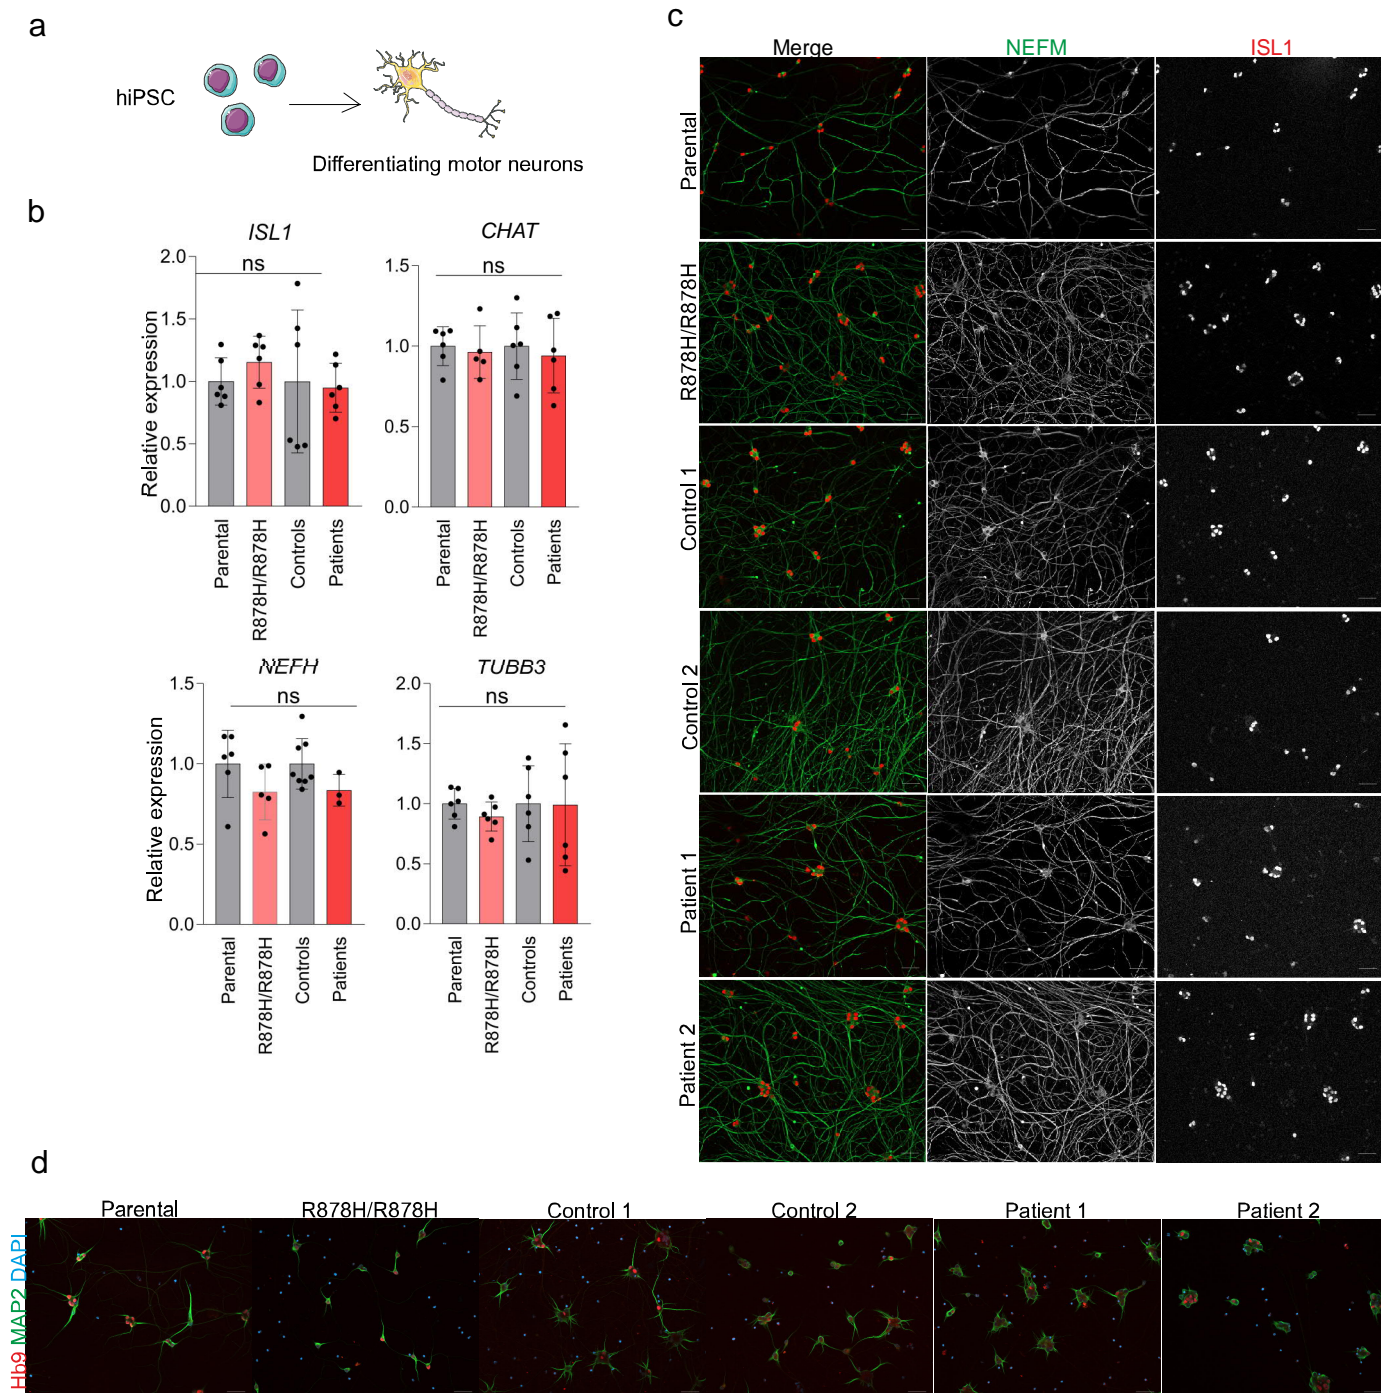

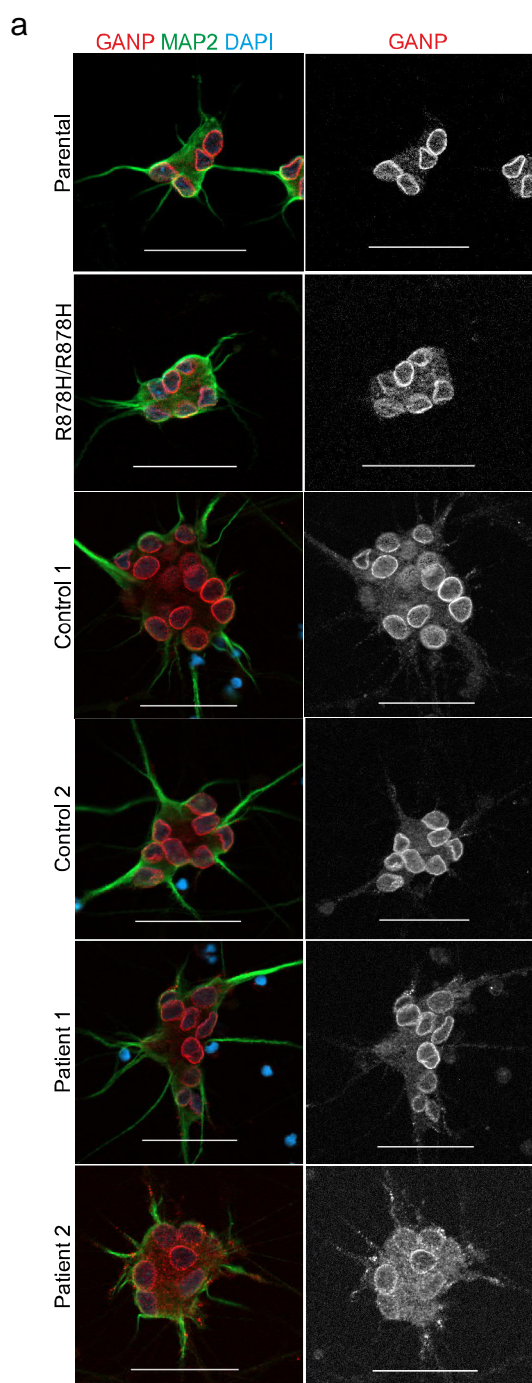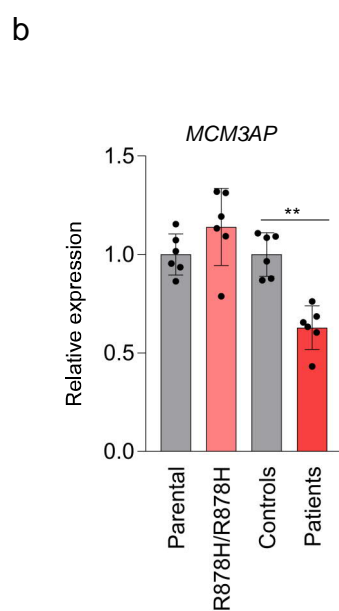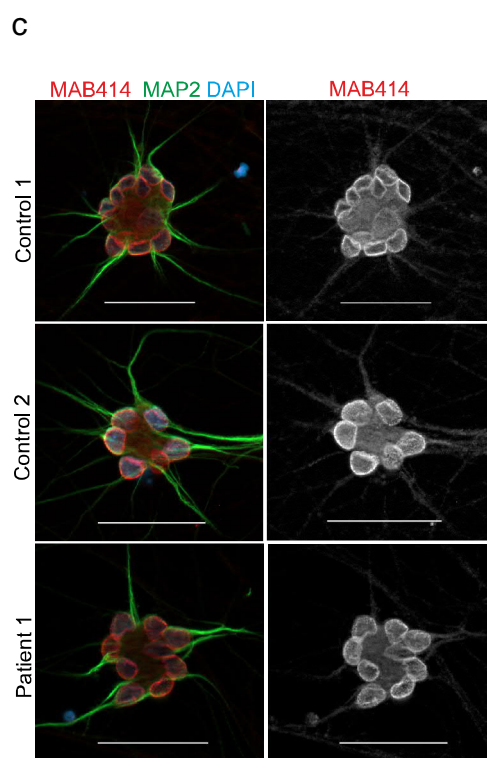

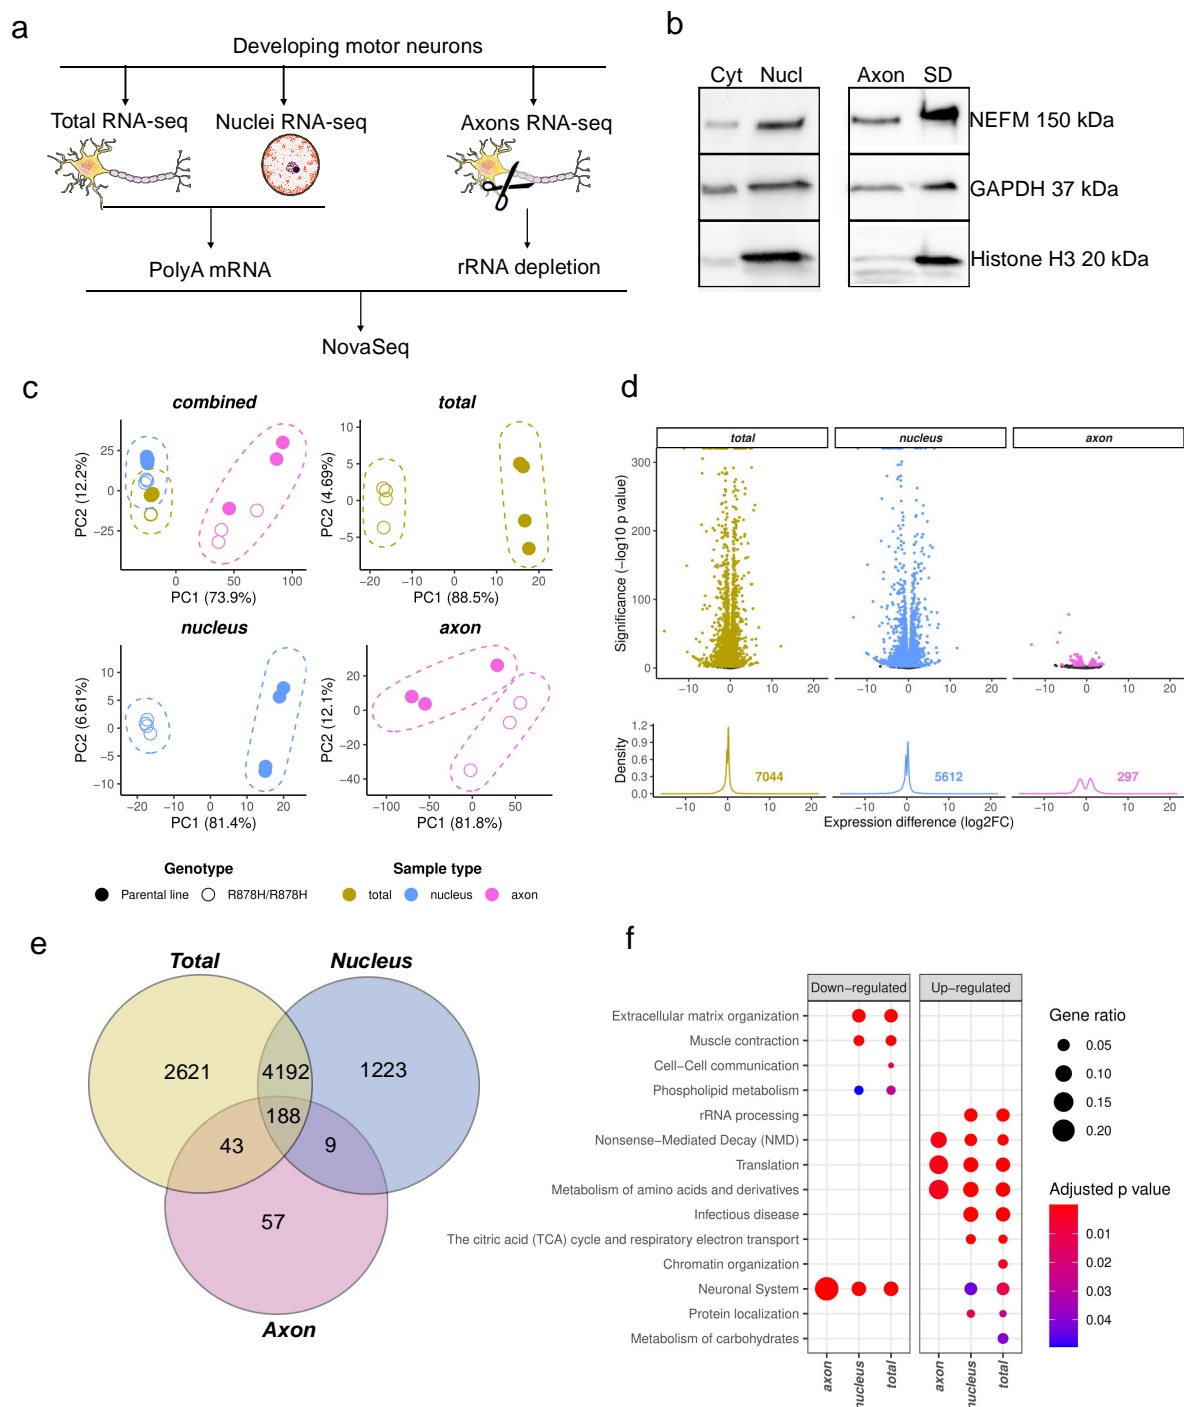



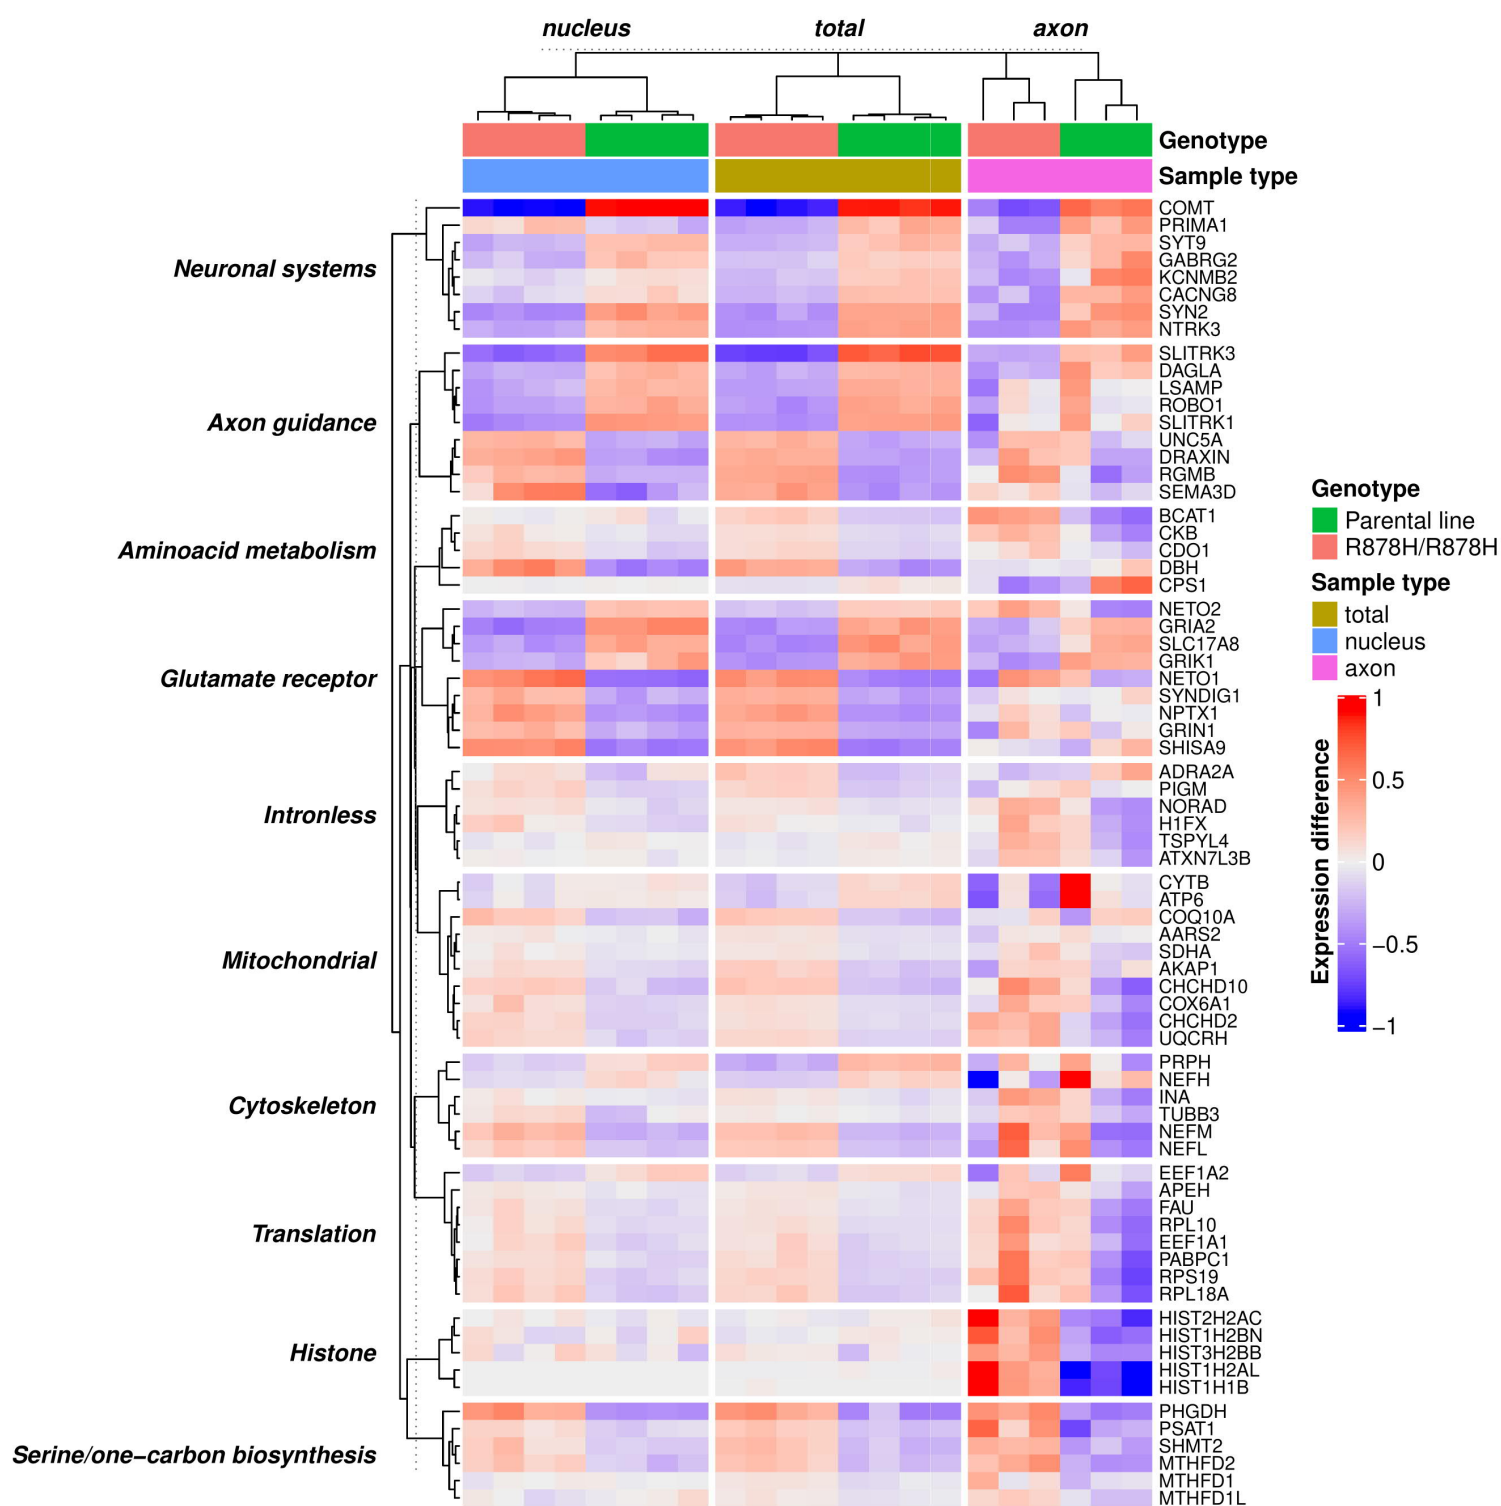

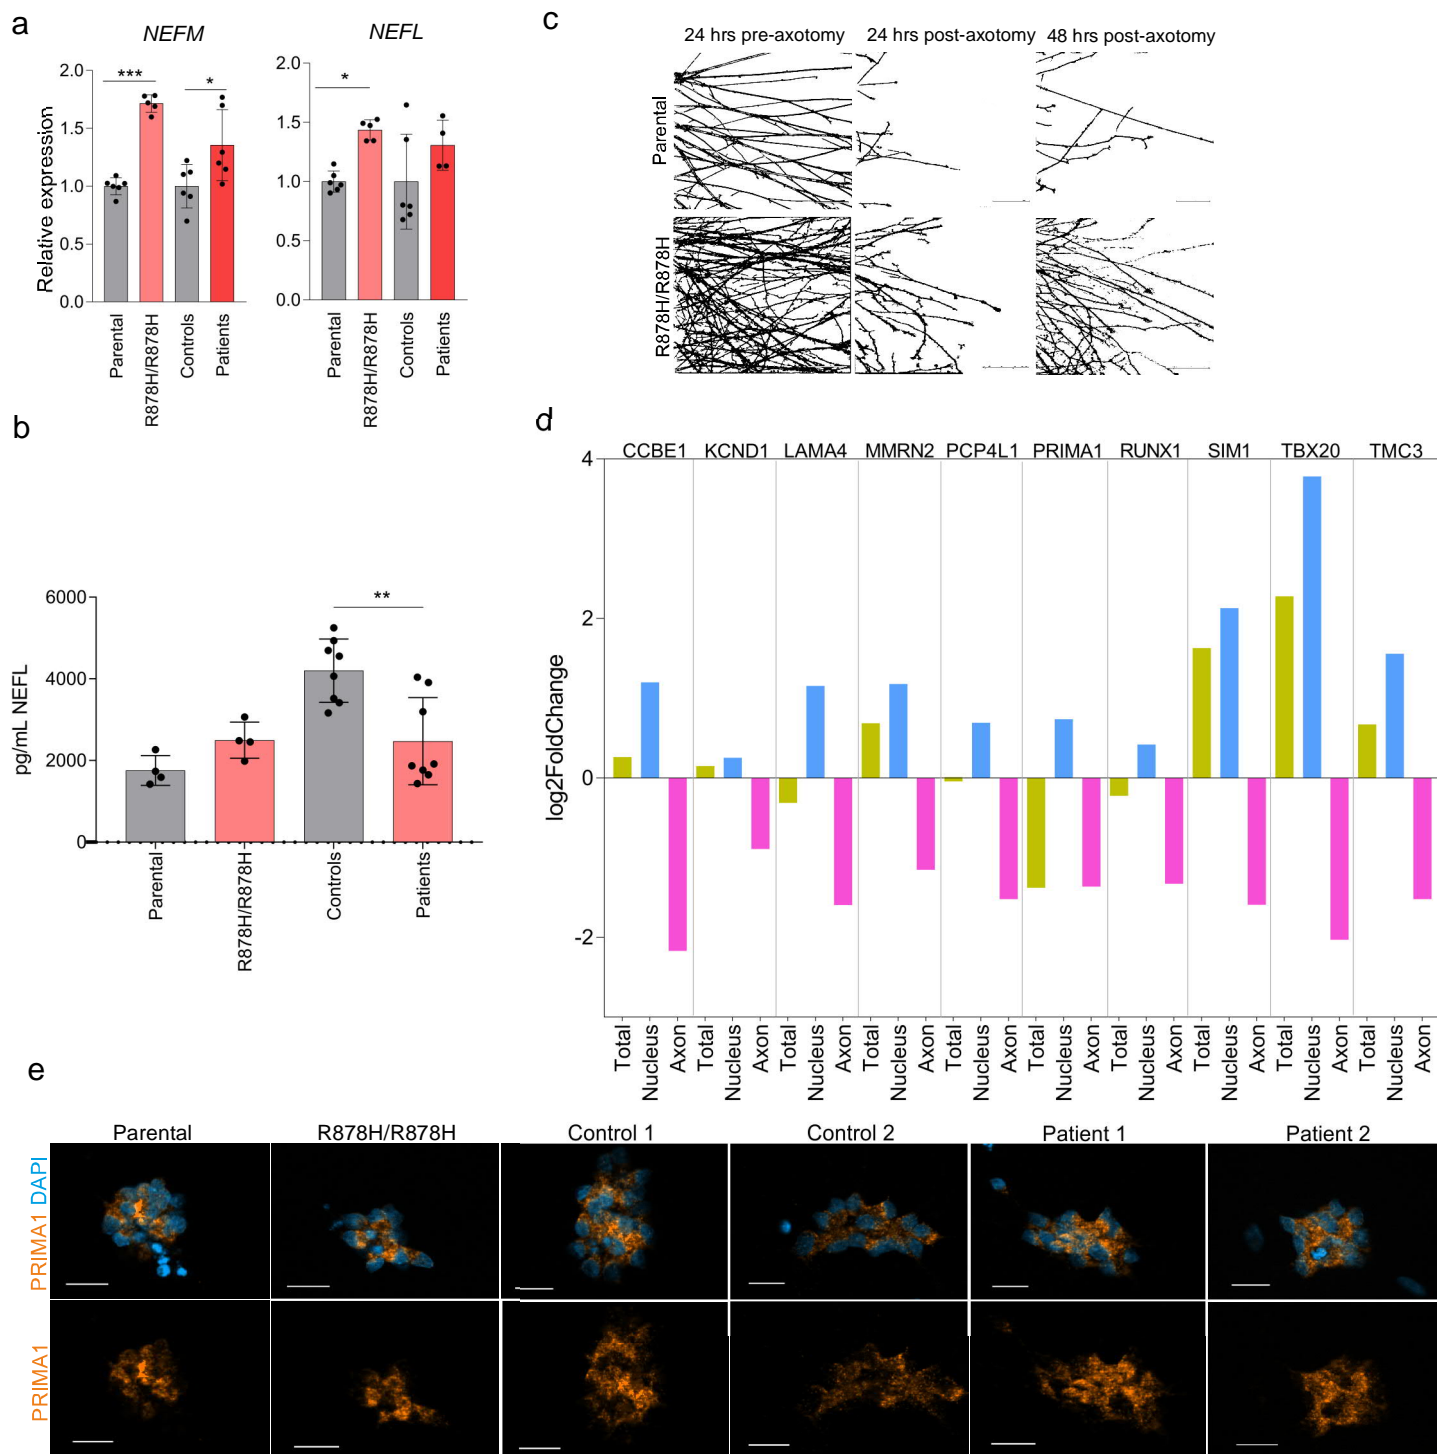

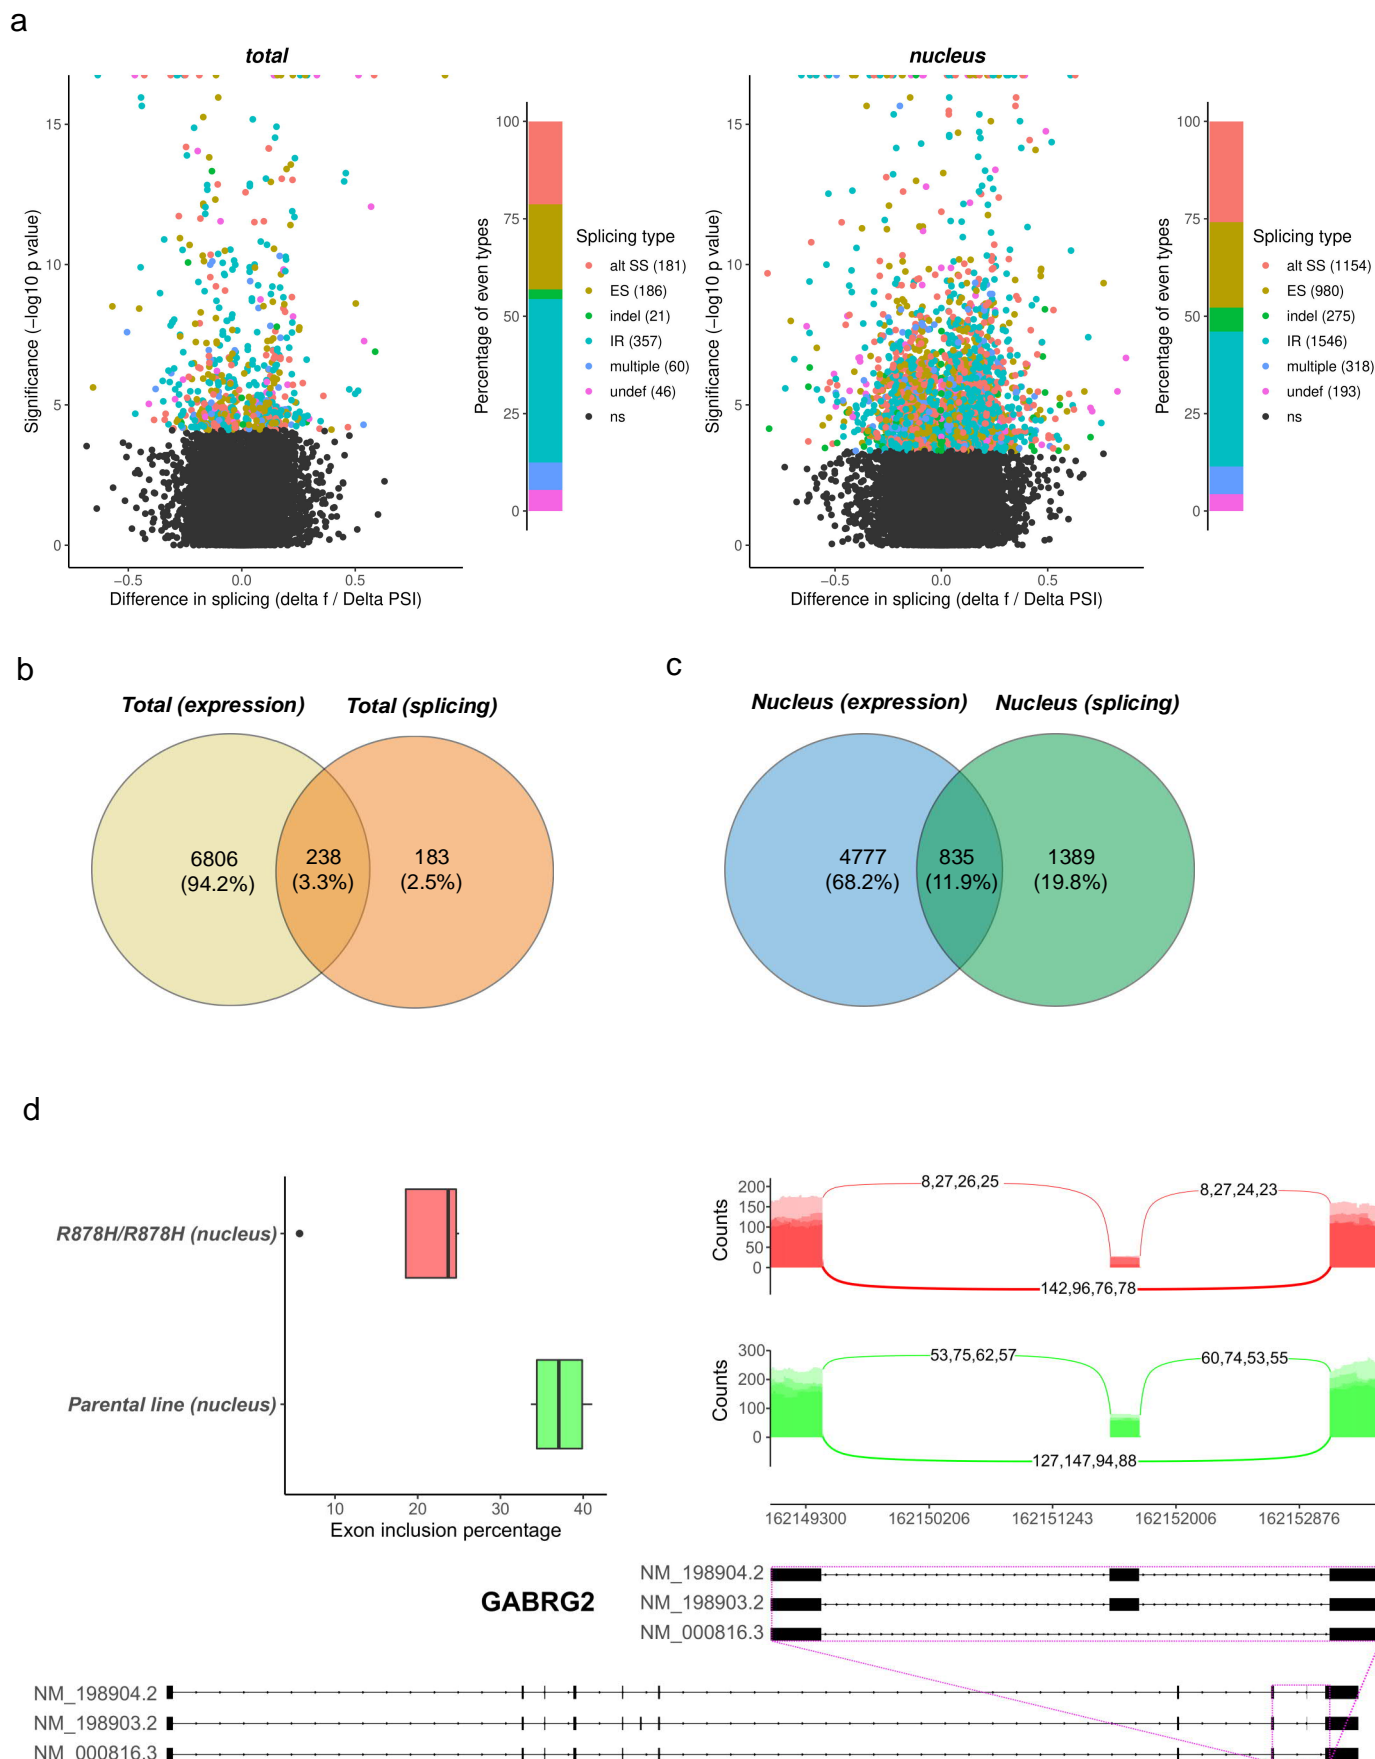

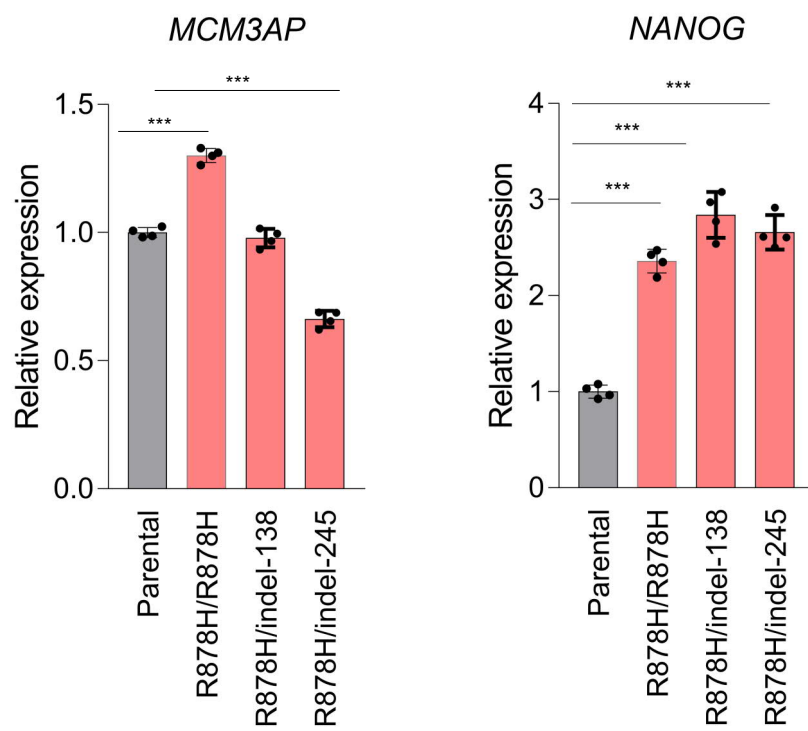

Source: https://www.biorxiv.org/content/biorxiv/early/2021/05/18/2021.05.18.444636.full.pdf
